# Supplementary material
Source: HighWire-hosted journal article supplement (https://bmjopen.bmj.com/content/11/1/e040408)
Supplement: inline-supplementary-material-1 [file inline-supplementary-material-1.pdf]

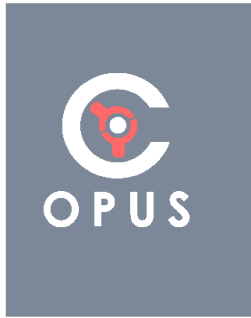

Version 5: 09/04/2020

# ST VINCENT'S MELBOURNE ARTHROPLASTY OUTCOMES (SMART) REGISTRY

Data Dictionary

9 April 2020

Version 5.0

Version 5: 09/04/2020

## Contents

|                                                       |    |
|-------------------------------------------------------|----|
| 1. SMART Registry Custodians and Key Contacts.....    | 3  |
| 2. Data Sources.....                                  | 4  |
| 3. Core Data Elements.....                            | 5  |
| 3.1 Patient Details.....                              | 5  |
| 3.1.1 Demographics and Patient Characteristics .....  | 5  |
| 3.1.2 Comorbidities .....                             | 7  |
| 3.2 Procedure Details.....                            | 20 |
| 3.2.1 Surgery Details .....                           | 20 |
| 3.2.2 Arthroplasty Details.....                       | 24 |
| 3.2.3 Implant and Bone Graft Details (Hip) .....      | 26 |
| 3.2.4 Implant and Bone Graft Details (Knee).....      | 29 |
| 3.2.5 Post-Operative Details.....                     | 34 |
| 3.3 Complications.....                                | 35 |
| 3.3.1 Medical Complications.....                      | 35 |
| 3.3.2 Surgical Complications.....                     | 39 |
| 3.3.3 Wound Complications .....                       | 43 |
| 3.3.4 Revisions, Readmissions, and Reoperations ..... | 44 |
| 3.4 Patient-Reported Outcome Measures .....           | 46 |
| 4. Secondary Data Elements.....                       | 58 |
| 4.1 Implant and Bone Graft Details (Hip) .....        | 58 |
| 4.2 Implant and Bone Graft Details (Knee).....        | 60 |
| 4.3 Patient-Reported Outcome Measures .....           | 62 |
| 4.4 Hospital Cost Data.....                           | 63 |
| 5. References .....                                   | 68 |

Version 5: 09/04/2020

1

## 1. SMART Registry Custodians and Key Contacts

|                                             | Name                                                       | Academic affiliation                                                                                                                                               | Contact details                                                                                   |
|---------------------------------------------|------------------------------------------------------------|--------------------------------------------------------------------------------------------------------------------------------------------------------------------|---------------------------------------------------------------------------------------------------|
| Registry Custodian & Principle Investigator | A/Prof Michelle Dowsey                                     | Principal Research Fellow, Department of Surgery, University of Melbourne<br>Head Arthritis Research, Department of Orthopaedics, St. Vincent's Hospital Melbourne | E: <a href="mailto:mmdowsey@unimelb.edu.au">mmdowsey@unimelb.edu.au</a><br>P: +61 3 9231 3955     |
| Registry Custodian & Principle Investigator | Prof Peter Choong                                          | Sir Hugh Devine Chair of Surgery, Head University of Melbourne Department of Surgery                                                                               | E: <a href="mailto:pchoong@unimelb.edu.au">pchoong@unimelb.edu.au</a><br>P: +61 3 9231 2365       |
| Investigator - Health Economists            | Prof Philip Clarke                                         | Professor of Health Economics, Centre for Health Policy, School of Population and Global Health, University of Melbourne                                           | E: <a href="mailto:philip.clarke@unimelb.edu.au">philip.clarke@unimelb.edu.au</a>                 |
|                                             | Dr Christopher Schilling                                   | Senior Research Fellow in Health Economics, University of Melbourne Dept. of Surgery                                                                               | E: <a href="mailto:chris.schilling@unimelb.edu.au">chris.schilling@unimelb.edu.au</a>             |
| Investigator - Biostatisticians             | Dr Tim Spelman                                             | University of Melbourne Dept. of Surgery, St. Vincent's Hospital                                                                                                   | E: <a href="mailto:tim@burnet.edu.au">tim@burnet.edu.au</a>                                       |
|                                             | Ms Sharmala Thuraisingam                                   | University of Melbourne Dept. of Surgery, St. Vincent's Hospital                                                                                                   | E: <a href="mailto:Sharmala.thuraisingam@unimelb.edu.au">Sharmala.thuraisingam@unimelb.edu.au</a> |
| Registry Co-ordinator                       | Ms Shamin Pereira                                          | St. Vincent's Hospital, Department of Orthopaedics, PO Box 2900, Fitzroy, Victoria, 3065                                                                           | E: <a href="mailto:SMARTRegistry@svha.org.au">SMARTRegistry@svha.org.au</a><br>P: +61 3 9231 3028 |
| Database – IT Support                       | Ms. Claire Weeden                                          | St. Vincent's Hospital, Department of Orthopaedics, PO Box 2900, Fitzroy, Victoria, 3065                                                                           | E: <a href="mailto:SMARTRegistry@svha.org.au">SMARTRegistry@svha.org.au</a><br>P: +61 3 9231 3028 |
| Data Entry                                  | Ms. Annabelle Choong<br>Mr Daniel Gould<br>Ms. Emma Choong | St. Vincent's Hospital, Department of Orthopaedics, PO Box 2900, Fitzroy, Victoria, 3065                                                                           | E: <a href="mailto:SMARTRegistry@svha.org.au">SMARTRegistry@svha.org.au</a><br>P: +61 3 9231 3028 |

2 Database Software: Socrates<sup>®</sup> Orthopaedic Outcomes Software (Database version 3.5.4.1. Software version 8.69)

3

3

1

| Source                                                | Description                                                                                                                                                                                                                                                                                                                                                                         |
|-------------------------------------------------------|-------------------------------------------------------------------------------------------------------------------------------------------------------------------------------------------------------------------------------------------------------------------------------------------------------------------------------------------------------------------------------------|
| Patient Administration System (PAS)                   | Stores administrative data, including:<br>Operative Theatre List – theatre room number and case number (e.g. case number 1 = first case of the day)<br>Operative time (knife to skin)<br>American Society of Anaesthesiologists (ASA) score                                                                                                                                         |
| Patient Medical Record (Medical Record On-line (MRO)) | Stores clinical data, including:<br>Patient clinical pathway<br>Anaesthetic chart<br>Consent form<br>Surgeon’s operative notes<br>Surgeon’s pre-operative and post-operative assessment notes<br>Blood Transfusion Report<br>Medication Chart<br>Analgesia Infusion Chart<br>Recovery Room Chart<br>Correspondence (e.g. GP referral letter)<br>Discharge summary<br>Progress notes |
| National Death Index                                  | Death data are obtained from Australian Orthopaedic Association annually and added to the patient’s record where applicable                                                                                                                                                                                                                                                         |
| Clinical Integration System (CIS)                     | Pre-operative radiographs within 6 months of surgery                                                                                                                                                                                                                                                                                                                                |
| Phone call and mail-out to patients                   | Patient-Reported Outcome Measures (PROMs)                                                                                                                                                                                                                                                                                                                                           |

22. Data Sources

3  
4  
5  
6  
7

3. Core Data Elements

- Unless otherwise specified, data elements have been collected for all patients who have undergone surgery since 01/01/1998.
- Unless otherwise specified, the Data Source is the St. Vincent’s Hospital Patient Administration System (PAS) and/or Patient Medical Record (Medical Record Online).
- Unless otherwise specified, there are no units of measurement for numeric variables.

3.1 Patient Details

3.1.1 Demographics and Patient Characteristics

The Kellgren-Lawrence grading system (KL-score) is a commonly used method for classifying the severity of osteoarthritis (OA) of the hip and knee.<sup>1</sup> Patients with more severe pre-operative radiographic hip or knee OA are more likely to achieve substantial gains in pain and function following total hip arthroplasty (THA) and total knee arthroplasty (TKA), respectively.<sup>2,3</sup>

The Socio-Economic Indexes for Areas (SEIFA) are calculated based on postcode to provide a relative measure of socioeconomic disadvantage at the level of the Australian Government’s Census Collection Districts.<sup>4</sup> SEIFA scores also correlate with the proportion of people living in an area who report poor health and risk factors for poor health, such as obesity.

The Australian Standard Geographical Classification (ASGC) was developed by the Australian Bureau of Statistics to facilitate quantitative comparisons between groups of people living in the ‘city’ and the ‘country, where the main distinguishing feature is physical remoteness from goods and services.<sup>5</sup> The classification system is used to guide health policy development and decision-making.<sup>6</sup>

| Variable (code)                             | Collection Period | Type of Variable | Relevant definition/ mean (SD); range | Data Source(s) |
|---------------------------------------------|-------------------|------------------|---------------------------------------|----------------|
| MART ID (smartid)                           |                   | Numeric          |                                       |                |
| Patient ID = Hospital ID Number (patientid) |                   | String           |                                       |                |
| Residential address (address)               |                   | String           |                                       |                |
| Suburb (suburb)                             |                   | String           |                                       |                |

Version 5: 09/04/2020

|                                        |  |             |                                                                 |                                                                                                                    |
|----------------------------------------|--|-------------|-----------------------------------------------------------------|--------------------------------------------------------------------------------------------------------------------|
| State (state)                          |  | String      |                                                                 |                                                                                                                    |
| Country (country)                      |  | String      |                                                                 |                                                                                                                    |
| Post Code (postcode)                   |  | Numeric     | XXXX                                                            |                                                                                                                    |
| Arthroplasty type (arthroplasty_type)  |  | Binary      | 1=Hip replacement<br>2=Knee replacement                         |                                                                                                                    |
| Last Name (lastname)                   |  | String      |                                                                 |                                                                                                                    |
| First Name (firstname)                 |  | String      |                                                                 |                                                                                                                    |
| Gender (gender)                        |  | Binary      | 1=Female<br>2=Male                                              |                                                                                                                    |
| Date of Birth (dob)                    |  | Date        | dd/mm/yyyy                                                      |                                                                                                                    |
| Marital status (maritalstatus)         |  | Categorical | 1=Single<br>2=Married<br>3=Divorced<br>4=Separated<br>5=Widowed |                                                                                                                    |
| Surgery side (surgeryside)             |  | Categorical | 1=Left<br>2=Right<br>3=Bilateral                                | Consent for Surgery Form                                                                                           |
| Place of birth (place_birth)           |  | String      |                                                                 |                                                                                                                    |
| Language (language)                    |  | String      |                                                                 |                                                                                                                    |
| Deceased (deceased)                    |  | Binary      | 0=No; 1=Yes                                                     | National Death Index – Obtained through the Australian Orthopaedic Association National Joint Replacement Registry |
| Date deceased (date_deceased)          |  | Date        | dd/mm/yyyy                                                      | National Death Index – Obtained through the Australian Orthopaedic Association National Joint Replacement Registry |
| Preoperative Weight [kg] (preop_wt_kg) |  | Numeric     | Preoperative mean (SD); range<br>TKA                            |                                                                                                                    |

Version 5: 09/04/2020

|                                                                                              |            |             |                                                                                                                  |                                                                                       |
|----------------------------------------------------------------------------------------------|------------|-------------|------------------------------------------------------------------------------------------------------------------|---------------------------------------------------------------------------------------|
|                                                                                              |            |             | 80.9 (18.2); 36.0 to 159.0<br>THA<br>81.1 (18.0); 36.0 to 158.0                                                  |                                                                                       |
| Preoperative Height [cm]<br>(preop_ht_cm)                                                    |            | Numeric     | Preoperative mean (SD); range<br>TKA<br>165.3 (10.1); 130 .0 to 200.0<br>THA<br>162.9 (10.1); 127.0 to 200.0     |                                                                                       |
| Pathology<br>(pathology)                                                                     |            | Categorical | 1=Inflammatory Arthritis<br>2=Osteoarthritis<br>3=Osteonecrosis<br>4=Other<br>5=Revision<br>6=Trauma<br>7=Tumour | Surgeon pre-operative assessment                                                      |
| Australian Statistical Geographical<br>Classification (ASGC) Remoteness<br>(asgc_remoteness) | 01/01/2002 | Categorical | 1=Major city<br>2=Inner regional<br>3=Outer regional<br>4=Remote<br>5=Very remote<br>6=Migratory                 | Obtained from the Australian Institute<br>of Health and Welfare website. <sup>7</sup> |
| Interpreter required<br>(interpreter)                                                        | 01/01/2002 | Binary      | 0=No; 1=Yes                                                                                                      |                                                                                       |
| Socio-Economic Indexes for Areas<br>(SEIFA)<br>(seifa)                                       | 01/01/2002 | Ordinal     | 1 to 10 (percentile)<br>Lower percentile = lower SES                                                             | Obtained from the Australian Bureau of<br>Statistics Dataset. <sup>8</sup>            |
| Contralateral hip KL score<br>(contra_khip_klscore)                                          | 01/01/2006 | Ordinal     | Kellgren Lawrence Grade<br>1 to 4                                                                                | Read from the pre-op radiographs<br>within 6 months of surgery <sup>1</sup> .         |
| Contralateral knee KL score<br>(contra_knee_klscore)                                         | 01/01/2006 | Ordinal     | Kellgren Lawrence Grade<br>1 to 4                                                                                | Read from the pre-op radiographs<br>within 6 months of surgery <sup>1</sup> .         |

1

2

### 3.1.2 Comorbidities

3

All co-morbidities listed in the pre-operative medical assessment are cross-checked with anaesthetist review on day of surgery. When comorbidities are identified that

4

are not yet included in the database, they are added accordingly.

Version 5: 09/04/2020

- 1 The Charlson Comorbidity Index was originally developed to predict mortality at one year in hospital in-patients with breast cancer, but it has since been widely used  
 2 in the orthopaedic literature as a valid measure of comorbidity burden in total hip and knee arthroplasty patients.<sup>9,10</sup>

| Variable (code)                                                                      | Collection Period | Type of Variable | Relevant definition/ mean (SD); range                         | Data Source(s)                                                                              |
|--------------------------------------------------------------------------------------|-------------------|------------------|---------------------------------------------------------------|---------------------------------------------------------------------------------------------|
| <b>Charlson Comorbidity Index</b>                                                    |                   |                  |                                                               |                                                                                             |
| Charlson Comorbidity Index (charlsonscore)                                           | 01/01/2006        | Ordinal          | Preoperative range:<br>TKA<br>0 to 8<br><br>THA<br>0 to 10    | Calculated from documented comorbidities using method described by Hall et al. <sup>9</sup> |
| Significant Comorbidity (sigcomorb)                                                  | 01/01/2006        | Binary           | 1=Significant comorbidities<br>2=No significant comorbidities |                                                                                             |
| <b>Charlson Comorbidities</b>                                                        |                   |                  |                                                               |                                                                                             |
| Myocardial Infarction (MI) (charlson_mi)                                             | 01/01/2006        | Binary           | 0=No; 1=Yes                                                   |                                                                                             |
| Congestive Heart Failure (CHF) (charlson_chf)                                        | 01/01/2006        | Binary           | 0=No; 1=Yes                                                   |                                                                                             |
| Peripheral Vascular Disease (PVD) (charlson_pvd)                                     | 01/01/2006        | Binary           | 0=No; 1=Yes                                                   |                                                                                             |
| Cerebrovascular Disease (CVA) or Transient Ischaemic Attack (TIA) (charlson_cva_tia) | 01/01/2006        | Binary           | 0=No; 1=Yes                                                   |                                                                                             |
| Dementia (charlson_dementia)                                                         | 01/01/2006        | Binary           | 0=No; 1=Yes                                                   |                                                                                             |
| Chronic Obstructive Pulmonary Disease (COPD) (charlson_copd)                         | 01/01/2006        | Binary           | 0=No; 1=Yes                                                   |                                                                                             |
| Connective Tissue Disease (Rheumatologic Disease) (charlson_connect_tiss)            | 01/01/2006        | Binary           | 0=No; 1=Yes                                                   |                                                                                             |
| Peptic Ulcer Disease (PUD) (charlson_ulcer)                                          | 01/01/2006        | Binary           | 0=No; 1=Yes                                                   |                                                                                             |
| Liver disease (charlson_liver)                                                       | 01/01/2006        | Categorical      | 0=No liver disease<br>1=Mild liver disease                    |                                                                                             |



Version 5: 09/04/2020

|                                                                 |            |             |                                                                      |  |
|-----------------------------------------------------------------|------------|-------------|----------------------------------------------------------------------|--|
|                                                                 |            |             | 2=Moderate to severe liver disease                                   |  |
| Diabetes<br>(charlson_diabetes)                                 | 01/01/2006 | Categorical | 0=No diabetes<br>1=Diabetes<br>2=Diabetes with end organ damage      |  |
| Hemiplegia<br>(charlson_hemiplegia)                             | 01/01/2006 | Binary      | 0=No; 1=Yes                                                          |  |
| Chronic Kidney Disease (CKD)<br>(charlson_ckd)                  | 01/01/2006 | Binary      | 0=No; 1=Yes                                                          |  |
| Tumour<br>(charlson_tumor)                                      | 01/01/2006 | Categorical | 0=No tumour<br>1=any tumour (localised)<br>2=metastatic solid tumour |  |
| Leukaemia<br>(charlson_leukemia)                                | 01/01/2006 | Binary      | 0=No; 1=Yes                                                          |  |
| Lymphoma<br>(charlson_lymphoma)                                 | 01/01/2006 | Binary      | 0=No; 1=Yes                                                          |  |
| Moderate or severe liver disease<br>(charlson_liver)            | 01/01/2006 | Binary      | 0=No; 1=Yes                                                          |  |
| Acquired Immunodeficiency<br>Syndrome (AIDS)<br>(charlson_aids) | 01/01/2006 | Binary      | 0=No; 1=Yes                                                          |  |
| All Other Comorbidities                                         |            |             |                                                                      |  |
| Cardiovascular                                                  |            |             |                                                                      |  |
| Abdominal Aortic Aneurysm<br>(comorb_aaa)                       |            | Binary      | 0=No; 1=Yes                                                          |  |
| Acute myocardial infarction<br>(comorb_ami)                     |            | Binary      | 0=No; 1=Yes                                                          |  |
| Angina<br>(comorb_angina)                                       |            | Binary      | 0=No; 1=Yes                                                          |  |
| Aortic Stenosis<br>(comorb_aort_sten)                           |            | Binary      | 0=No; 1=Yes                                                          |  |
| Aortic Valve Replacement<br>(comorb_avr)                        |            | Binary      | 0=No; 1=Yes                                                          |  |
| Arrhythmia<br>(comorb_arrhythmia)                               |            | Binary      | 0=No; 1=Yes                                                          |  |

Version 5: 09/04/2020

|                                                          |  |        |             |  |
|----------------------------------------------------------|--|--------|-------------|--|
| Atrial fibrillation<br>(comorb_af)                       |  | Binary | 0=No; 1=Yes |  |
| Cardiac surgery<br>(comorb_card_surg)                    |  | Binary | 0=No; 1=Yes |  |
| Cardiomyopathy<br>(comorb_cardiomyopathy)                |  | Binary | 0=No; 1=Yes |  |
| Carotid Artery Disease<br>(comorb_carart_dis)            |  | Binary | 0=No; 1=Yes |  |
| Congestive Cardiac Failure<br>(comorb_ccf)               |  | Binary | 0=No; 1=Yes |  |
| Coronary Artery Disease<br>(comorb_corart_dis)           |  | Binary | 0=No; 1=Yes |  |
| Heart Murmur<br>(comorb_heart_murmur)                    |  | Binary | 0=No; 1=Yes |  |
| Hypercholesterolaemia<br>(comorb_hypercholest)           |  | Binary | 0=No; 1=Yes |  |
| Hypertension<br>(comorb_ht)                              |  | Binary | 0=No; 1=Yes |  |
| Ischaemic Heart Disease<br>(comorb_ihd)                  |  | Binary | 0=No; 1=Yes |  |
| Left Ventricular Failure<br>(comorb_lvf)                 |  | Binary | 0=No; 1=Yes |  |
| Mitral Valve Replacement<br>(comorb_mvr)                 |  | Binary | 0=No; 1=Yes |  |
| Pacemaker<br>(comorb_pacemaker)                          |  | Binary | 0=No; 1=Yes |  |
| Palpitations<br>(comorb_palpatations)                    |  | Binary | 0=No; 1=Yes |  |
| Paroxysmal Atrial Fibrillation<br>(comorb_paroxysmal_af) |  | Binary | 0=No; 1=Yes |  |
| Peripheral Vascular Disease<br>(comorb_pvd)              |  | Binary | 0=No; 1=Yes |  |
| Renal Artery Stenosis<br>(comorb_ren_art_sten)           |  | Binary | 0=No; 1=Yes |  |
| Rheumatic Fever<br>(comorb_rheum_fev)                    |  | Binary | 0=No; 1=Yes |  |

Version 5: 09/04/2020

|                                                           |  |        |             |  |
|-----------------------------------------------------------|--|--------|-------------|--|
| Supraventricular Tachycardia<br>(comorb_svt)              |  | Binary | 0=No; 1=Yes |  |
| Varicose Veins<br>(comorb_varicose_veins)                 |  | Binary | 0=No; 1=Yes |  |
| <b>Dermatological</b>                                     |  |        |             |  |
| Bullous Pemphigoid<br>(comorb_bull_pemp)                  |  | Binary | 0=No; 1=Yes |  |
| Dermatitis<br>(comorb_dermatitis)                         |  | Binary | 0=No; 1=Yes |  |
| Eczema<br>(comorb_eczema)                                 |  | Binary | 0=No; 1=Yes |  |
| Lipodermatosclerosis<br>(comorb_lipodermat)               |  | Binary | 0=No; 1=Yes |  |
| Psoriasis<br>(comorb_psoriasis)                           |  | Binary | 0=No; 1=Yes |  |
| Pyoderma Gangrenosum<br>(comorb_pyo_gang)                 |  | Binary | 0=No; 1=Yes |  |
| Rosacea<br>(comorb_rosacea)                               |  | Binary | 0=No; 1=Yes |  |
| Venous Ulcer<br>(comorb_venous_ulcer)                     |  | Binary | 0=No; 1=Yes |  |
| <b>Endocrine</b>                                          |  |        |             |  |
| Addison's Disease<br>(comorb_addisons_dis)                |  | Binary | 0=No; 1=Yes |  |
| Goitre<br>(comorb_goitre)                                 |  | Binary | 0=No; 1=Yes |  |
| Hypothyroidism<br>(comorb_hypothyroidism)                 |  | Binary | 0=No; 1=Yes |  |
| Hyperthyroidism<br>(comorb_hyperthyr)                     |  | Binary | 0=No; 1=Yes |  |
| Insulin-dependent Diabetes Mellitus<br>(comorb_iddm)      |  | Binary | 0=No; 1=Yes |  |
| Non-Insulin-Dependent Diabetes Mellitus<br>(comorb_niddm) |  | Binary | 0=No; 1=Yes |  |

Version 5: 09/04/2020

|                                                                        |  |        |             |  |
|------------------------------------------------------------------------|--|--------|-------------|--|
| Peripheral Neuropathy (diabetes complication)<br>(comorb_periph_neuro) |  | Binary | 0=No; 1=Yes |  |
| Gastrointestinal                                                       |  |        |             |  |
| Autoimmune Hepatitis<br>(comorb_autoimmune_hep)                        |  | Binary | 0=No; 1=Yes |  |
| Barrett's Oesophagitis<br>(comorb_barretts_oesophagitis)               |  | Binary | 0=No; 1=Yes |  |
| Cirrhosis<br>(comorb_cirrhosis)                                        |  | Binary | 0=No; 1=Yes |  |
| Coeliac Disease<br>(comorb_coeliac)                                    |  | Binary | 0=No; 1=Yes |  |
| Crohn's Disease<br>(comorb_crohns_disease)                             |  | Binary | 0=No; 1=Yes |  |
| Diverticular disease<br>(comorb_diverticular_dis)                      |  | Binary | 0=No; 1=Yes |  |
| Fatty Liver<br>(comorb_fatty_liver)                                    |  | Binary | 0=No; 1=Yes |  |
| Gastroesophageal Reflux Disease<br>(comorb_gord)                       |  | Binary | 0=No; 1=Yes |  |
| Hepatitis A<br>(comorb_hepa)                                           |  | Binary | 0=No; 1=Yes |  |
| Hepatitis C<br>(comorb_hep_c)                                          |  | Binary | 0=No; 1=Yes |  |
| Hepatitis B<br>(comorb_hep_b)                                          |  | Binary | 0=No; 1=Yes |  |
| Hiatus Hernia<br>(comorb_hiatus_hernia)                                |  | Binary | 0=No; 1=Yes |  |
| Irritable Bowel Syndrome<br>(comorb_ibs)                               |  | Binary | 0=No; 1=Yes |  |
| Liver Disease<br>(comorb_liver_disease)                                |  | Binary | 0=No; 1=Yes |  |
| Oesophageal Ulcer<br>(comorb_ulcer_oesophag)                           |  | Binary | 0=No; 1=Yes |  |
| Pancreatitis<br>(comorb_pancreatitis)                                  |  | Binary | 0=No; 1=Yes |  |

Version 5: 09/04/2020

|                                                     |  |        |             |  |
|-----------------------------------------------------|--|--------|-------------|--|
| Peptic Ulcer Disease<br>(comorb_pud)                |  | Binary | 0=No; 1=Yes |  |
| Ulcerative Colitis<br>(comorb_ulcerative_colitis)   |  | Binary | 0=No; 1=Yes |  |
| <b>Haematological</b>                               |  |        |             |  |
| Acromegaly<br>(comorb_acromegaly)                   |  | Binary | 0=No; 1=Yes |  |
| Anaemia<br>(comorb_anaemia)                         |  | Binary | 0=No; 1=Yes |  |
| Deep Vein Thrombosis<br>(comorb_dvt)                |  | Binary | 0=No; 1=Yes |  |
| Factor V Leiden<br>(comorb_vleid_def)               |  | Binary | 0=No; 1=Yes |  |
| Haemochromatosis<br>(comorb_haemochrom)             |  | Binary | 0=No; 1=Yes |  |
| Haemophilia<br>(comorb_haemophilia)                 |  | Binary | 0=No; 1=Yes |  |
| Hyperparathyroidism<br>(comorb_hyperparathyroidism) |  | Binary | 0=No; 1=Yes |  |
| Hypokalaemia<br>(comorb_hypokalaemia)               |  | Binary | 0=No; 1=Yes |  |
| Hypoparathyroidism<br>(comorb_hypoparathyr)         |  | Binary | 0=No; 1=Yes |  |
| Iron Deficiency<br>(comorb_fe_deficiency)           |  | Binary | 0=No; 1=Yes |  |
| Neutropenia<br>(comorb_neutropenia)                 |  | Binary | 0=No; 1=Yes |  |
| Polycythaemia<br>(comorb_polycythaemia)             |  | Binary | 0=No; 1=Yes |  |
| Protein C Deficiency<br>(comorb_protein_cdefic)     |  | Binary | 0=No; 1=Yes |  |
| Pulmonary Embolism<br>(comorb_pe)                   |  | Binary | 0=No; 1=Yes |  |
| Splenectomy<br>(comorb_splenectomy)                 |  | Binary | 0=No; 1=Yes |  |

Version 5: 09/04/2020

|                                                       |  |        |             |  |
|-------------------------------------------------------|--|--------|-------------|--|
| Thrombocytopaenia<br>(comorb_thrombocyt)              |  | Binary | 0=No; 1=Yes |  |
| Thalassaemia Minor<br>(comorb_thalassaemia_minor)     |  | Binary | 0=No; 1=Yes |  |
| Vitamin B12 Deficiency<br>(comorb_vit_b12_deficiency) |  | Binary | 0=No; 1=Yes |  |
| Vitamin D Deficiency<br>(comorb_vit_d_def)            |  | Binary | 0=No; 1=Yes |  |
| Warfarin therapy<br>(comorb_warfarin)                 |  | Binary | 0=No; 1=Yes |  |
| Neoplastic                                            |  |        |             |  |
| Bladder Cancer<br>(comorb_ca_bladder)                 |  | Binary | 0=No; 1=Yes |  |
| Bowel Cancer<br>(comorb_ca_bowel)                     |  | Binary | 0=No; 1=Yes |  |
| Breast Cancer<br>(comorb_ca_breast)                   |  | Binary | 0=No; 1=Yes |  |
| Cervical Cancer<br>(comorb_ca_cervix)                 |  | Binary | 0=No; 1=Yes |  |
| Endometrial Cancer<br>(comorb_ca_endometrium)         |  | Binary | 0=No; 1=Yes |  |
| Hepatobiliary Cancer<br>(comorb_ca_hepat)             |  | Binary | 0=No; 1=Yes |  |
| Leukaemia<br>(comorb_leukaemia)                       |  | Binary | 0=No; 1=Yes |  |
| Liposarcoma<br>(comorb_ca_liposarcoma)                |  | Binary | 0=No; 1=Yes |  |
| Lung Cancer<br>(comorb_ca_lung)                       |  | Binary | 0=No; 1=Yes |  |
| Lymphoedema<br>(comorb_lymphodema)                    |  | Binary | 0=No; 1=Yes |  |
| Lymphoma<br>(comorb_lymphoma)                         |  | Binary | 0=No; 1=Yes |  |
| Melanoma<br>(comorb_ca_skin_mel)                      |  | Binary | 0=No; 1=Yes |  |

Version 5: 09/04/2020

|                                                                                    |  |        |             |  |
|------------------------------------------------------------------------------------|--|--------|-------------|--|
| Meningioma<br>(comorb_meningioma)                                                  |  | Binary | 0=No; 1=Yes |  |
| Multiple Myeloma<br>(comorb_mul_myel)                                              |  | Binary | 0=No; 1=Yes |  |
| Myelodysplasia<br>(comorb_myelodysplasia)                                          |  | Binary | 0=No; 1=Yes |  |
| Non-Hodgkin Lymphoma<br>(comorb_nhl)                                               |  | Binary | 0=No; 1=Yes |  |
| Oesophageal Cancer<br>(comorb_ca_oesophagus)                                       |  | Binary | 0=No; 1=Yes |  |
| Osteosarcoma<br>(comorb_ca_ostsarc)                                                |  | Binary | 0=No; 1=Yes |  |
| Ovarian cancer<br>(comorb_ca_ovary)                                                |  | Binary | 0=No; 1=Yes |  |
| Prostate Cancer<br>(comorb_ca_prostate)                                            |  | Binary | 0=No; 1=Yes |  |
| Renal Cancer<br>(comorb_ca_kidney)                                                 |  | Binary | 0=No; 1=Yes |  |
| Skin Cancer (basal cell carcinoma,<br>squamous cell carcinoma)<br>(comorb_ca_skin) |  | Binary | 0=No; 1=Yes |  |
| Soft Tissue Cancer<br>(comorb_ca_softtiss)                                         |  | Binary | 0=No; 1=Yes |  |
| Stomach Cancer<br>(comorb_ca_stomach)                                              |  | Binary | 0=No; 1=Yes |  |
| Testicular Cancer<br>(comorb_ca_testes)                                            |  | Binary | 0=No; 1=Yes |  |
| Throat Cancer<br>(comorb_ca_throat)                                                |  | Binary | 0=No; 1=Yes |  |
| Thyroid Cancer<br>(comorb_ca_thyroid)                                              |  | Binary | 0=No; 1=Yes |  |
| Uterine Cancer<br>(comorb_ca_uterus)                                               |  | Binary | 0=No; 1=Yes |  |
| Vocal Fold Cancer<br>(comorb_ca_vocalcords)                                        |  | Binary | 0=No; 1=Yes |  |
| Neurological                                                                       |  |        |             |  |

Version 5: 09/04/2020

|                                                  |  |        |             |  |
|--------------------------------------------------|--|--------|-------------|--|
| Amyloidosis<br>(comorb_amyloidosis)              |  | Binary | 0=No; 1=Yes |  |
| Bell's Palsy<br>(comorb_bells_palsy)             |  | Binary | 0=No; 1=Yes |  |
| Cerebral Aneurysm<br>(comorb_cereb_aneu)         |  | Binary | 0=No; 1=Yes |  |
| Cerebral Palsy<br>(comorb_cerebral_palsy)        |  | Binary | 0=No; 1=Yes |  |
| Cerebrovascular Accident<br>(comorb_cva)         |  | Binary | 0=No; 1=Yes |  |
| Epilepsy<br>(comorb_epilepsy)                    |  | Binary | 0=No; 1=Yes |  |
| Hearing Impaired<br>(comorb_hear_impaired)       |  | Binary | 0=No; 1=Yes |  |
| Meniere's Disease<br>(comorb_menieres_disease)   |  | Binary | 0=No; 1=Yes |  |
| Migraine<br>(comorb_migraine)                    |  | Binary | 0=No; 1=Yes |  |
| Multiple Sclerosis<br>(comorb_ms)                |  | Binary | 0=No; 1=Yes |  |
| Parkinson's Disease<br>(comorb_parkinsons)       |  | Binary | 0=No; 1=Yes |  |
| Polio<br>(comorb_polio)                          |  | Binary | 0=No; 1=Yes |  |
| Restless Legs Syndrome<br>(comorb_restless_legs) |  | Binary | 0=No; 1=Yes |  |
| Subarachnoid Haemorrhage<br>(comorb_sah)         |  | Binary | 0=No; 1=Yes |  |
| Syphilis<br>(comorb_syphilis)                    |  | Binary | 0=No; 1=Yes |  |
| Transient Ischaemic Attack<br>(comorb_tia)       |  | Binary | 0=No; 1=Yes |  |
| Trigeminal Neuralgia<br>(comorb_trig_neural)     |  | Binary | 0=No; 1=Yes |  |
| Vertigo<br>(comorb_vertigo)                      |  | Binary | 0=No; 1=Yes |  |



Version 5: 09/04/2020

| Psychiatric & Cognitive                                        |  |        |             |  |
|----------------------------------------------------------------|--|--------|-------------|--|
| Alcohol Abuse<br>(comorb_alcohol_abuse)                        |  | Binary | 0=No; 1=Yes |  |
| Alzheimer Disease<br>(comorb_alzheimers)                       |  | Binary | 0=No; 1=Yes |  |
| Bipolar Affective Disorder<br>(comorb_bipolar_affect_disorder) |  | Binary | 0=No; 1=Yes |  |
| Borderline Personality Disorder<br>(comorb_border_persdis)     |  | Binary | 0=No; 1=Yes |  |
| Dementia<br>(comorb_dementia)                                  |  | Binary | 0=No; 1=Yes |  |
| Depression<br>(comorb_depression)                              |  | Binary | 0=No; 1=Yes |  |
| Generalised Anxiety Disorder<br>(comorb_anxiety)               |  | Binary | 0=No; 1=Yes |  |
| Obsessive Compulsive Disorder<br>(comorb OCD)                  |  | Binary | 0=No; 1=Yes |  |
| Post-Traumatic Stress Disorder<br>(comorb PTSD)                |  | Binary | 0=No; 1=Yes |  |
| Schizophrenia<br>(comorb_schizophrenia)                        |  | Binary | 0=No; 1=Yes |  |
| Renal & Urological                                             |  |        |             |  |
| Benign Prostatic Hypertrophy<br>(comorb_bph)                   |  | Binary | 0=No; 1=Yes |  |
| Chronic Kidney Disease<br>(comorb_ckd)                         |  | Binary | 0=No; 1=Yes |  |
| End-Stage Kidney Disease<br>(comorb_eskd)                      |  | Binary | 0=No; 1=Yes |  |
| Nephrectomy<br>(comorb_nephrectomy)                            |  | Binary | 0=No; 1=Yes |  |
| Transurethral Resection of Prostate<br>(comorb TURP)           |  | Binary | 0=No; 1=Yes |  |
| Urinary Incontinence<br>(comorb_urinary_incontinence)          |  | Binary | 0=No; 1=Yes |  |

Version 5: 09/04/2020

|                                                      |  |             |                          |  |
|------------------------------------------------------|--|-------------|--------------------------|--|
| Urinary Tract Infection<br>(comorb_uti)              |  | Binary      | 0=No; 1=Yes              |  |
| Respiratory                                          |  |             |                          |  |
| Asbestosis<br>(comorb_asbestosis)                    |  | Binary      | 0=No; 1=Yes              |  |
| Asthma<br>(comorb_asthma)                            |  | Binary      | 0=No; 1=Yes              |  |
| Bronchiectasis<br>(comorb_bronchiectasis)            |  | Binary      | 0=No; 1=Yes              |  |
| Chronic Obstructive Airways Disease<br>(comorb_coad) |  | Binary      | 0=No; 1=Yes              |  |
| Emphysema<br>(comorb_emphysema)                      |  | Binary      | 0=No; 1=Yes              |  |
| Ex-smoker<br>(comorb_ex_smoker)                      |  | Binary      | 0=No; 1=Yes              |  |
| Interstitial Lung Disease<br>(comorb_inter_lung_dis) |  | Binary      | 0=No; 1=Yes              |  |
| Obstructive Sleep Apnoea<br>(comorb_osa)             |  | Binary      | 0=No; 1=Yes              |  |
| Pulmonary Fibrosis<br>(comorb_pulmonary_fib)         |  | Binary      | 0=No; 1=Yes              |  |
| Pulmonary Hypertension<br>(comorb_pulm_hyper)        |  | Binary      | 0=No; 1=Yes              |  |
| Smoker<br>(comorb_smoker)                            |  | Categorical | 0=Never<br>1=Ex<br>2=Yes |  |
| Tuberculosis<br>(comorb_tb)                          |  | Binary      | 0=No; 1=Yes              |  |
| Rheumatological & Orthopaedic                        |  |             |                          |  |
| Ankylosing Spondylitis<br>(comorb_ank_spond)         |  | Binary      | 0=No; 1=Yes              |  |
| Arthritis<br>(comorb_arthritis)                      |  | Binary      | 0=No; 1=Yes              |  |
| Back Pain<br>(comorb_back_pain)                      |  | Binary      | 0=No; 1=Yes              |  |

Version 5: 09/04/2020

|                                                           |  |        |             |  |
|-----------------------------------------------------------|--|--------|-------------|--|
| Below-Knee Amputation<br>(comorb_bka)                     |  | Binary | 0=No; 1=Yes |  |
| Bilateral Total Hip Replacement<br>(comorb_thr_bilateral) |  | Binary | 0=No; 1=Yes |  |
| Chronic Fatigue Syndrome<br>(comorb_chronic_fatig)        |  | Binary | 0=No; 1=Yes |  |
| Fibromyalgia<br>(comorb_fibromyalgia)                     |  | Binary | 0=No; 1=Yes |  |
| Gout<br>(comorb_gout)                                     |  | Binary | 0=No; 1=Yes |  |
| Left Total Hip Replacement<br>(comorb_l_thr)              |  | Binary | 0=No; 1=Yes |  |
| Left Total Knee Replacement<br>(comorb_ltkr)              |  | Binary | 0=No; 1=Yes |  |
| Myasthenia Gravis<br>(comorb_myas_grav)                   |  | Binary | 0=No; 1=Yes |  |
| Osteomyelitis<br>(comorb_osteomyelitis)                   |  | Binary | 0=No; 1=Yes |  |
| Osteoporosis<br>(comorb_osteoporosis)                     |  | Binary | 0=No; 1=Yes |  |
| Paget's Disease<br>(comorb_pagets_dis)                    |  | Binary | 0=No; 1=Yes |  |
| Polymyalgia<br>(comorb_polymyalgia)                       |  | Binary | 0=No; 1=Yes |  |
| Psoriatic Arthritis<br>(comorb_psoriatic_arth)            |  | Binary | 0=No; 1=Yes |  |
| Rheumatoid Arthritis<br>(comorb_rheumatoid)               |  | Binary | 0=No; 1=Yes |  |
| Right Total Hip Replacement<br>(comorb_r_thr)             |  | Binary | 0=No; 1=Yes |  |
| Right Total Knee Replacement<br>(comorb_rtkr)             |  | Binary | 0=No; 1=Yes |  |
| Sarcoidosis<br>(comorb_sarcoidosis)                       |  | Binary | 0=No; 1=Yes |  |
| Scleroderma<br>(comorb_scleroderma)                       |  | Binary | 0=No; 1=Yes |  |

Version 5: 09/04/2020

|                                                       |  |        |             |  |
|-------------------------------------------------------|--|--------|-------------|--|
| Scoliosis<br>(comorb_scoliosis)                       |  | Binary | 0=No; 1=Yes |  |
| Septic Arthritis<br>(comorb_septic_arth)              |  | Binary | 0=No; 1=Yes |  |
| Sjogren's Syndrome<br>(comorb_sjogrens_syndrome)      |  | Binary | 0=No; 1=Yes |  |
| Spinal Cord Infection<br>(comorb_spinalcord_inf)      |  | Binary | 0=No; 1=Yes |  |
| Systemic Lupus Erythematosus<br>(comorb_sle)          |  | Binary | 0=No; 1=Yes |  |
| Temporal Arteritis<br>(comorb_temp_arteritis)         |  | Binary | 0=No; 1=Yes |  |
| Total Hip Replacement<br>(comorb_thr)                 |  | Binary | 0=No; 1=Yes |  |
| Vasculitis<br>(comorb_vasculitis)                     |  | Binary | 0=No; 1=Yes |  |
| Visual System                                         |  |        |             |  |
| Cataracts<br>(comorb_cataracts)                       |  | Binary | 0=No; 1=Yes |  |
| Blindness<br>(comorb_blind)                           |  | Binary | 0=No; 1=Yes |  |
| Glaucoma<br>(comorb_glaucoma)                         |  | Binary | 0=No; 1=Yes |  |
| Macular Degeneration<br>(comorb_macular_degeneration) |  | Binary | 0=No; 1=Yes |  |

3.2 Procedure Details

3.2.1 Surgery Details

The American Society of Anaesthesiologists (ASA) Physical Classification is a measure of the overall health status of patients undergoing surgery.<sup>11</sup> Higher scores have been correlated with increased risk of surgical complications.<sup>12</sup>

| Variable (code) | Collection Period | Type of Variable | Relevant definition/<br>mean (SD); range | Data Source(s) |
|-----------------|-------------------|------------------|------------------------------------------|----------------|
|-----------------|-------------------|------------------|------------------------------------------|----------------|

Version 5: 09/04/2020

|                                                                                      |            |             |                                                                                                                                                            |                                                                          |
|--------------------------------------------------------------------------------------|------------|-------------|------------------------------------------------------------------------------------------------------------------------------------------------------------|--------------------------------------------------------------------------|
| Surgeon<br>(surgeon)                                                                 |            | String      |                                                                                                                                                            | Surgeon intraoperative-operative notes                                   |
| Date of admission<br>(dateofadmission)                                               |            | Date        | dd/mm/yyyy                                                                                                                                                 |                                                                          |
| Date of discharge<br>(dateofdischarge)                                               |            | Date        | dd/mm/yyyy                                                                                                                                                 |                                                                          |
| Discharge destination<br>(dischargedto)                                              |            | Categorical | 1=Home<br>2=Rehab Centre<br>3=Other Hospital<br>4=Other                                                                                                    |                                                                          |
| Date of Surgery<br>(surgerydate)                                                     |            | Date        | dd/mm/yyyy                                                                                                                                                 | Operative Theatre List                                                   |
| Surgery Status<br>(surgerystatus)                                                    |            | Categorical | 1=On-going<br>2=Lost to follow-up<br>3=Withdrawn from study<br>4=Failed<br>5=No further Follow-up required                                                 | Mail out and follow-up phone call                                        |
| Surgery Type<br>(surgerytype)                                                        |            | Categorical | 1=Primary<br>2=Revision own<br>3=Revision (primary elsewhere)                                                                                              |                                                                          |
| American Society of Anesthesiologists<br>(ASA) Classification<br>(anaestheticrating) | 01/01/2002 | Ordinal     | ASA Physical Status 1 to 4<br>Owens et al. <sup>13</sup>                                                                                                   | Anaesthetic Chart on the day of surgery                                  |
| Venous Thromboembolism (VTE)<br>Prophylaxis<br>(anticoagulant)                       |            | Categorical | 1=Aspirin 150mg<br>2=Aspirin 300mg<br>3=Clexane 20u/ml<br>4=Clexane 40u/ml<br>5=Fragmin 2500u/ml<br>6=Fragmin 5000u/ml<br>7=Heparin 5000u/ml BD<br>8=Other |                                                                          |
| Haemoglobin (Hb) [g/dL]<br>(biochemistryhb)                                          |            | Numeric     | Preoperative Mean (SD); range<br>TKA<br>136.2 (13.9); 71 to 186<br>THA<br>137.2 (13.7); 91 to 192                                                          | Obtained at preadmission assessment<br>within 2 weeks of planned surgery |
| Wound drain<br>(drains)                                                              |            | Categorical | 1=Standard<br>2=Reinfusion<br>3=Other                                                                                                                      |                                                                          |

Version 5: 09/04/2020

|                                                                       |            |             |                                                                                                                                                             |  |
|-----------------------------------------------------------------------|------------|-------------|-------------------------------------------------------------------------------------------------------------------------------------------------------------|--|
|                                                                       |            |             | 4=No drains                                                                                                                                                 |  |
| Wound drain output [mL]<br>(drain_loss)                               |            | Numeric     | Preoperative range<br>TKA<br>5 to 2,400<br>THA<br>5 to 2,960                                                                                                |  |
| Duration of Surgery Knife to Skin<br>[minutes]<br>(durationofsurgery) |            | Numeric     | Preoperative mean (SD); range<br>TKA<br>103.4 (29.2); 40 to 296<br>THA<br>104.7 (32.4); 30 to 376                                                           |  |
| Operator level<br>(operator)                                          | 01/01/2002 | Categorical | 1=Surgeon<br>2=Fellow<br>3=Senior Registrar<br>4=Junior registrar/ resident                                                                                 |  |
| Assistant<br>(assistant)                                              |            | Categorical | 1=Fellow,<br>2=Registrar Set 1<br>3=Registrar Set 2<br>4=Registrar Set 3<br>5=Registrar Set 4<br>6=Registrar Set 5<br>7=Surgeon<br>8=Unaccredited Registrar |  |
| Transfusion required<br>(packedredbloodcells)                         |            | Binary      | 0=No; 1=Yes                                                                                                                                                 |  |
| Transfusion quantity<br>(packedredbloodcellsqty)                      |            | Numeric     | Postoperative range<br>TKA<br>0 to 10<br>THA<br>0 to 15                                                                                                     |  |
| Hospital<br>(hospclinic)                                              |            | Categorical | 1=Public<br>2=Private                                                                                                                                       |  |
| Regional Block                                                        |            |             |                                                                                                                                                             |  |

Version 5: 09/04/2020

|                                            |  |        |             |                                         |
|--------------------------------------------|--|--------|-------------|-----------------------------------------|
| Lumbar Plexus<br>(regblock_lumbar)         |  | Binary | 0=No; 1=Yes | Anaesthetic Chart on the day of surgery |
| Femoral Nerve<br>(regblock_femnerve)       |  | Binary | 0=No; 1=Yes | Anaesthetic Chart on the day of surgery |
| Facia Iliaca<br>(regblock_fasciailiaca)    |  | Binary | 0=No; 1=Yes | Anaesthetic Chart on the day of surgery |
| Sciatic Nerve<br>(regblock_sciaticnerve)   |  | Binary | 0=No; 1=Yes | Anaesthetic Chart on the day of surgery |
| Adductor Canal<br>(regblock_addbcanal)     |  | Binary | 0=No; 1=Yes | Anaesthetic Chart on the day of surgery |
| Femoral Triangle<br>(regblock_femtriangle) |  | Binary | 0=No; 1=Yes | Anaesthetic Chart on the day of surgery |
| Local Wound Infiltration<br>(regblock_lwi) |  | Binary | 0=No; 1=Yes | Anaesthetic Chart on the day of surgery |
| Other<br>(regblock_other)                  |  | Binary | 0=No; 1=Yes | Anaesthetic Chart on the day of surgery |
| <b>Anaesthetic</b>                         |  |        |             |                                         |
| General<br>(anaesthetic_general)           |  | Binary | 0=No; 1=Yes | Anaesthetic Chart on the day of surgery |
| Epidural<br>(anaesthetic_epidural)         |  | Binary | 0=No; 1=Yes | Anaesthetic Chart on the day of surgery |
| Sedation<br>(anaesthetic_sedation)         |  | Binary | 0=No; 1=Yes | Anaesthetic Chart on the day of surgery |
| Spinal<br>(anaesthetic_spinal)             |  | Binary | 0=No; 1=Yes | Anaesthetic Chart on the day of surgery |
| Regional block<br>(anaesthetic_reg_block)  |  | Binary | 0=No; 1=Yes | Anaesthetic Chart on the day of surgery |
| Local anaesthetic<br>(anaes_local)         |  | Binary | 0=No; 1=Yes | Anaesthetic Chart on the day of surgery |
| Other<br>(anaes_other)                     |  | Binary | 0=No; 1=Yes | Anaesthetic Chart on the day of surgery |

Version 5: 09/04/2020

### 3.2.2 Arthroplasty Details

The Charnley classification system was originally designed to stratify patients into three categories in order to better understand the variability in the outcome of arthroplasty, namely walking ability, based on the severity of comorbid conditions which also impact upon mobility.<sup>10</sup> Charnley score has subsequently been found to significantly affect pain and function according to a range of measures, some of which are included in this data dictionary, including the Western Ontario and McMaster Universities Osteoarthritis Index (WOMAC).<sup>10</sup>

| Variable (code)                        | Collection Period | Type of Variable | Relevant definition/<br>mean (SD); range                                                                                                                                                                                                                                                | Data Source(s)                                 |
|----------------------------------------|-------------------|------------------|-----------------------------------------------------------------------------------------------------------------------------------------------------------------------------------------------------------------------------------------------------------------------------------------|------------------------------------------------|
| Procedure (arthroplasty_type)          |                   | Binary           | 1=Hip replacement<br>2=Knee replacement                                                                                                                                                                                                                                                 | Consent Form                                   |
| Bilateral Sequence (bilateral)         |                   | Categorical      | 0=No<br>1=Staged<br>2=Simultaneous                                                                                                                                                                                                                                                      | Noted in medical record and confirmed on X-ray |
| Charnley Score – Hip (charnley_*)      |                   | Categorical      | 1=A Unilateral Hip Arthritis<br>2=B1 Unilateral THA, opposite hip arthritis<br>3=B2 Bilateral THA<br>4=C1 THA, but remote arthritis affecting ambulation<br>5=C2 THA, but medical condition affecting ambulation<br>6=C3 Unilateral or Bilateral THA with Unilateral or Bilateral TKA   |                                                |
| Charnley Score – Knee (charnley_*)     |                   | Categorical      | 1=A Unilateral Knee Arthritis<br>2=B1 Unilateral TKA, opposite knee arthritis<br>3=B2 Bilateral TKA<br>4=C1 TKA, but remote arthritis affecting ambulation<br>5=C2 TKA, but medical condition affecting ambulation<br>6=C3 Unilateral or Bilateral TKA with Unilateral or Bilateral THA |                                                |
| Surgery Type (surgerytype)             |                   | Categorical      | 1=Primary<br>2=Revision own<br>3=Revision elsewhere                                                                                                                                                                                                                                     | Surgeon intraoperative-operative notes         |
| Procedure Type – Knee (procedure_knee) |                   | Categorical      | 1=TKA<br>2=Uni Medial<br>3=Uni Lateral                                                                                                                                                                                                                                                  | Surgeon intraoperative-operative notes         |



Version 5: 09/04/2020

|                                                             |            |             |                                                                                                                                       |                                        |
|-------------------------------------------------------------|------------|-------------|---------------------------------------------------------------------------------------------------------------------------------------|----------------------------------------|
|                                                             |            |             | 4=Patello femoral<br>5=Patella replacement<br>6=Bi-compartmental<br>7=Removal of prosthesis<br>8=Liner exchange<br>9=Tibial component |                                        |
| Procedure Type - Hip<br>(procedure_hip)                     |            | Categorical | 1=THA<br>2=Hip Resurfacing<br>3=Femoral replacement<br>4=Acetabular replacement<br>5= Liner exchange                                  | Surgeon intraoperative-operative notes |
| Preoperative Alignment<br>(preopalignment)                  |            | Categorical | 1=Normal<br>2=Valgus<br>3=Varus                                                                                                       |                                        |
| Range of Motion – Hyperextension<br>(romhyperextensionflag) |            | Binary      | 0=No; 1=Yes                                                                                                                           |                                        |
| Hyperextension [degrees]<br>(romhyperextension)             |            | Numeric     | Preoperative range<br>1 to 10                                                                                                         |                                        |
| Mechanical Axis [degrees]<br>(romalignmechaxis)             |            | Numeric     | Preoperative range<br>-33 to 44                                                                                                       |                                        |
| Approach (Hip)<br>(approach)                                |            | Categorical | 1=Posterior<br>2=Direct lateral/trans gluteal<br>3=Anterior<br>4=Lateral<br>5=Combined<br>6=Superpath                                 | Surgeon intraoperative-operative notes |
| Approach (Knee)<br>(approach)                               |            | Categorical | 1=Med Parapatellar<br>2=Mid Vastus<br>3=Sub Vastus<br>4=Lat Parapatellar                                                              | Surgeon intraoperative-operative notes |
| Navigation Used<br>(navigation)                             |            | Binary      | 0=No; 1=Yes                                                                                                                           | Surgeon intraoperative-operative notes |
| Alignment Referencing<br>(alignmentreferencing)             | 01/01/2014 | Categorical | 1=Intramedullary femur/ Extramedullary tibia<br>2=All IM<br>3=Navigation,<br>4=Patient specific guides<br>5=Robotic                   | Surgeon intraoperative-operative notes |

Version 5: 09/04/2020

## 1 3.2.3 Implant and Bone Graft Details (Hip)

| Variable (code)             | Collection Period | Type of Variable | Relevant definition/<br>mean (SD); range                                                                                                                                                                                                                                                                                                                                                                                                                                                                                    | Data Source(s)                                                |
|-----------------------------|-------------------|------------------|-----------------------------------------------------------------------------------------------------------------------------------------------------------------------------------------------------------------------------------------------------------------------------------------------------------------------------------------------------------------------------------------------------------------------------------------------------------------------------------------------------------------------------|---------------------------------------------------------------|
| Femur Brand<br>(femurbrand) |                   | Categorical      | 1=ACCOLADE<br>2=ALLOCLASSIC SL<br>3=ALLOCLASSIC SLL<br>4=AMIS<br>5=AMIS-h<br>6=ARCOS MODULAR REVISION<br>7=BIRMINGHAM<br>8=C-STEM<br>9=C-STEM AMT<br>10=CHART-STIK<br>11=CLS<br>12=CONE<br>13=CORAIL<br>14=CORAIL REVISION<br>15=CPT<br>16=DUROM<br>17=ELITE PLUS<br>18=EPOCH<br>19=EXETER<br>20=GMRS<br>21=GUARDIAN<br>22=HNR<br>23=KAR<br>24=KOTZ<br>25=MALLORY TAPER<br>26=MATRIX<br>27=METASUL<br>28=MIA<br>29=MS 30<br>30=NIL<br>31=NITRIDED<br>32=OMNIFIT<br>33=PFM<br>34=PROFEMUR<br>35=PROFEMUR Xm<br>36=PROFEMUR-L | Electronic Medical Record - As per manufacturer implant label |

Version 5: 09/04/2020

|                                                      |  |             |                                                                                                                                                                                                                                                                                                |                                                               |
|------------------------------------------------------|--|-------------|------------------------------------------------------------------------------------------------------------------------------------------------------------------------------------------------------------------------------------------------------------------------------------------------|---------------------------------------------------------------|
|                                                      |  |             | 37=QUADR-C<br>38=QUADRA-H<br>39=R3<br>40=RECLAIM<br>41=RESTORATION<br>42=REV. VERSYS<br>43=REVITAN<br>44=S/ROM<br>45=SECURA-FIT<br>46=SL-INTEGRATION +<br>47=SL-PLUS<br>48=SOLUTION<br>49=STREAMLINE<br>50=TAPERFIT<br>51=VERSYS<br>52=WAGNER<br>53=X-ACTA<br>54=ZMR NITRIDED<br>55=ZWEYMULLER |                                                               |
| <b>Femur Fixation<br/>(femurthrfixation)</b>         |  | Categorical | 1=Cement<br>2=Cementless                                                                                                                                                                                                                                                                       | Surgeon intraoperative-operative notes                        |
| <b>Femur Cement Type<br/>(femurcementtype)</b>       |  | Binary      | 1=Plain<br>2=Antibiotic                                                                                                                                                                                                                                                                        |                                                               |
| <b>Cementation<br/>(cementation)</b>                 |  | Categorical | 1=Hybrid<br>2=Resurfacing<br>3=Totally cemented<br>4=Uncemented                                                                                                                                                                                                                                |                                                               |
| <b>Cement Type<br/>(acetabulumcementtype)</b>        |  | Binary      | 1=Plain<br>2=Antibiotic                                                                                                                                                                                                                                                                        | Electronic Medical Record – As per manufacturer label         |
| <b>Femoral Head Size [mm]<br/>(headdiametersize)</b> |  | String      | 22.2, 26, 28, 32, 36, 48, 50, 52, 58,<br>Other                                                                                                                                                                                                                                                 | Electronic Medical Record - As per manufacturer implant label |
| <b>Acetabulum Brand<br/>(acetabulumbrand)</b>        |  | String      | 1=ALLOFIT<br>2=ALLPRO<br>3=ARMOR<br>4=ARTEK<br>5=ARTHROPOR II<br>6=BIPOLAR<br>7=BURCH-SCHNEIDER<br>8=CHARNLEY                                                                                                                                                                                  | Electronic Medical Record - As per manufacturer implant label |

Version 5: 09/04/2020

|  |  |  |                                                                                                                                                                                                                                                                                                                                                                                                                                                                                                                                                                                                                                                                                                                                                                                                            |  |
|--|--|--|------------------------------------------------------------------------------------------------------------------------------------------------------------------------------------------------------------------------------------------------------------------------------------------------------------------------------------------------------------------------------------------------------------------------------------------------------------------------------------------------------------------------------------------------------------------------------------------------------------------------------------------------------------------------------------------------------------------------------------------------------------------------------------------------------------|--|
|  |  |  | 9=CHART-STIK<br>10=CONTEMPORARY<br>11=CONTINUUM/TRABEC<br>12=COTYLE VERSYS<br>13=CUSTOM MADE<br>14=DELTA-ONE-TT<br>15=DELTA-TT<br>16=DELTAMOTION<br>17=DURALOC BANTOM<br>18=DURALOC DYNAMIC<br>19=DURALOC LOCK RING<br>20=DURALOC SECTOR<br>21=DUROM, Dynasty-PC<br>22=ELITE PLUS<br>23=ELITE/OGEE<br>24=EXETER<br>25=EXETER RIMFIT<br>26=FITMORE<br>27=G7 OSSEO TI<br>28=HNR<br>29=KERBOUL SHELL M.E.<br>30=MULLER MALLORY<br>31=MARATHON XPLE<br>32=METSUL<br>33=MITCH TRH<br>34=MPACT<br>35=PINNACLE 100<br>36=PINNACLE BANTOM<br>37=PINNACLE BANT W<br>38=PINNACLE DUOFIX<br>39=PINNACLE GRIPTON<br>40=PINNACLE GVF<br>41=PINNACLEMULTI<br>42=PINNACLE SECTOR<br>43=PROCOTYL-L<br>44=PROTEK<br>45=REFLECTION SP3 HA<br>46=REINFORCE-RING<br>47=RESTORATION ADM<br>48=RESTORATION GAP II<br>49=RINGLOCK |  |
|--|--|--|------------------------------------------------------------------------------------------------------------------------------------------------------------------------------------------------------------------------------------------------------------------------------------------------------------------------------------------------------------------------------------------------------------------------------------------------------------------------------------------------------------------------------------------------------------------------------------------------------------------------------------------------------------------------------------------------------------------------------------------------------------------------------------------------------------|--|

Version 5: 09/04/2020

|                                                |  |             |                                                                                                                                                                                                   |                                                          |
|------------------------------------------------|--|-------------|---------------------------------------------------------------------------------------------------------------------------------------------------------------------------------------------------|----------------------------------------------------------|
|                                                |  |             | 50=SECURA – FIT<br>51=STIKTITE R3<br>52=TRABECULAR<br>53=TRIDENT<br>54=TRILOGY<br>55=TRINITY<br>56=TRITANIUM<br>57=UNIPOLAR<br>58=VERSAFIT<br>59=VITALOCK,<br>60=WROB GOLF BALL<br>61=ZWEYMUELLER |                                                          |
| Cup Fixation<br>(acetabulumcupfixation)        |  | Categorical | 1=Cement<br>2=Cementless                                                                                                                                                                          | Surgeon intraoperative-operative notes                   |
| Articulating Surface<br>(articulatingssurface) |  | Categorical | 1=Metal/Polyethylene (PE)<br>2=Ceramic/PE<br>3=Metal/Metal<br>4=Ceramic/Ceramic<br>5=Metal/Ceramic                                                                                                | Electronic Medical Record - As per<br>manufacturer label |
| Mini Incision<br>(mini_incision)               |  | Binary      | 0=No; 1=Yes                                                                                                                                                                                       | Surgeon intraoperative-operative notes                   |

1

2

3.2.4 Implant and Bone Graft Details (Knee)

| Variable (code)             | Collection<br>Period | Type of<br>Variable | Relevant definition/<br>mean (SD); range                                                                                                                               | Data Source(s)                                                   |
|-----------------------------|----------------------|---------------------|------------------------------------------------------------------------------------------------------------------------------------------------------------------------|------------------------------------------------------------------|
| Femur Brand<br>(femurbrand) |                      | Categorical         | 1=AVANTIM<br>2=AGC<br>3=ALLEGRETTO<br>4=APOLLO<br>5=ATTUNE<br>6=AVON<br>7=DURACON<br>8=DURATION<br>9=GENESIS II<br>10=GMK<br>11=GMK REVISION<br>12=GMRS<br>13=GUARDIAN | Electronic Medical Record - As per<br>manufacturer implant label |

Version 5: 09/04/2020

|                                                |  |             |                                                                                                                                                                                                                                                                                                                                                                                                                                                                                                                                                                                       |                                        |
|------------------------------------------------|--|-------------|---------------------------------------------------------------------------------------------------------------------------------------------------------------------------------------------------------------------------------------------------------------------------------------------------------------------------------------------------------------------------------------------------------------------------------------------------------------------------------------------------------------------------------------------------------------------------------------|----------------------------------------|
|                                                |  |             | 14=J &J REV<br>15=KINEMATIC<br>16=KINEMAX CONDUL<br>17=LEGION<br>18=LEGION - OXINUM<br>19=LEGION REVISION<br>20=M.B.T. REVISION<br>21=MAXIM<br>22=MG 2<br>23=MILLER GALLANTE<br>24=MRH<br>25=NAT-KNEE<br>26=NEXGEN<br>27=NEXGEN-MBK<br>28=NEXGEN M/BLOCK<br>29=NEXGEN-LCCK<br>30=OSTEONICS<br>31=OXFORD UC<br>32=PFC<br>33=PFC TC3<br>34=PRESERVATION<br>35=RBK<br>36=REPICCI<br>37=RESTORIS MCK<br>38=S-ROM<br>39=SCORPIO NRG X3<br>40=SCORPIO TKS<br>41=SCORPIO (OSTEONICS)<br>42=TRIATHLON<br>43=TRIATHLON TS<br>44=UNI-COMP<br>45=UNICOMP TKS<br>46=UNIX<br>47=VANGUARD<br>48=ZUK |                                        |
| <b>Femur Fixation<br/>(femurfixation)</b>      |  | Categorical | 1=Cement<br>2=Cementless                                                                                                                                                                                                                                                                                                                                                                                                                                                                                                                                                              | Surgeon intraoperative-operative notes |
| <b>Femur Cement Type<br/>(femurcementtype)</b> |  | Binary      | 1=Plain<br>2=Antibiotic                                                                                                                                                                                                                                                                                                                                                                                                                                                                                                                                                               | Surgeon intraoperative-operative notes |

Version 5: 09/04/2020

|                                               |  |             |                                                                                                                                                                                                                                                                                                                                                                                                                                                                          |                                                                  |
|-----------------------------------------------|--|-------------|--------------------------------------------------------------------------------------------------------------------------------------------------------------------------------------------------------------------------------------------------------------------------------------------------------------------------------------------------------------------------------------------------------------------------------------------------------------------------|------------------------------------------------------------------|
| Patella Intervention<br>(patellaintervention) |  | Categorical | 1=Resurfaced<br>2=Not Resurfaced<br>3=Patelloplasty                                                                                                                                                                                                                                                                                                                                                                                                                      | Surgeon intraoperative-operative notes                           |
| Patella Fixation<br>(patellafixation)         |  | Categorical | 1=Cement<br>2=Cementless                                                                                                                                                                                                                                                                                                                                                                                                                                                 | Surgeon intraoperative-operative notes                           |
| Patella Brand<br>(patellabrand)               |  | String      | 1=ADVANTIM<br>2=AGC<br>3=APOLLO<br>4=ATTUNE<br>5=AVON<br>6=DURACON<br>7=DURATION<br>8=GENISIS I<br>9=GMK<br>10=GMK REVISION<br>11=GMRS<br>12=GUARDIAN<br>13=KINEMATIC<br>14=KINEMAX CONDUL<br>15=MAXIM<br>16=MG 2<br>17=MILLER GALLANTE<br>18=NAT-KNEE<br>19=NEXGEN<br>20=OSTEONICS<br>21=PFC<br>22=PFC TC3<br>23=RESTORIS MCK<br>24=S-ROM<br>25=SCORPIO NRG X3<br>26=SCORPIO TKS<br>27=SCORPIO (OSTEONICS)<br>28=TRIATHLON<br>29=TRIATHLON TS<br>30=UNIX<br>31=VANGUARD | Electronic Medical Record - As per<br>manufacturer implant label |
| Patella Cement Type<br>(patellacementtype)    |  | Binary      | 1=Plain<br>2=Antibiotic                                                                                                                                                                                                                                                                                                                                                                                                                                                  | Surgeon intraoperative-operative notes                           |
| Tibia Brand<br>(tibiabrand)                   |  | Categorical | 1=AVANTIM<br>2=AGC                                                                                                                                                                                                                                                                                                                                                                                                                                                       | Electronic Medical Record - As per<br>manufacturer implant label |

Version 5: 09/04/2020

|  |  |  |                                                                                                                                                                                                                                                                                                                                                                                                                                                                                                                                                                                                                                                                       |  |
|--|--|--|-----------------------------------------------------------------------------------------------------------------------------------------------------------------------------------------------------------------------------------------------------------------------------------------------------------------------------------------------------------------------------------------------------------------------------------------------------------------------------------------------------------------------------------------------------------------------------------------------------------------------------------------------------------------------|--|
|  |  |  | 3=ALLEGRETTO<br>4=APOLLO<br>5=ATTUNE<br>6=AVON<br>7=DURACON<br>8=DURATION<br>9=GENESIS II<br>10=GMK<br>11=GMK REVISION<br>12=GMRS<br>13=GUARDIAN<br>14=J &J REV<br>15=KINEMATIC<br>16=KINEMAX CONDUL<br>17=LEGION<br>18=LEGION - OXINUM,<br>19=LEGION REVISION<br>20=M.B.T. REVISION<br>21=MAXIM<br>22=MG 2<br>23=MILLER GALLANTE<br>24=MRH<br>25=NAT-KNEE<br>26=NEXGEN<br>27=NEXGEN-MBK<br>28=NEXGEN M/BLOCK<br>29=NEXGEN-LCCK<br>30=OSTEONICS<br>31=OXFORD UC<br>32=PFC<br>33=PFC TC3<br>34=PRESERVATION<br>35=RBK<br>36=REPICCI<br>37=RESTORIS MCK<br>38=S-ROM<br>39=SCORPIO NRG X3<br>40=SCORPIO TKS<br>41=SCORPIO (OSTEONICS)<br>42=TRIATHLON<br>43=TRIATHLON TS |  |
|--|--|--|-----------------------------------------------------------------------------------------------------------------------------------------------------------------------------------------------------------------------------------------------------------------------------------------------------------------------------------------------------------------------------------------------------------------------------------------------------------------------------------------------------------------------------------------------------------------------------------------------------------------------------------------------------------------------|--|



Version 5: 09/04/2020

|                                                  |  |             |                                                                |                                                                  |
|--------------------------------------------------|--|-------------|----------------------------------------------------------------|------------------------------------------------------------------|
|                                                  |  |             | 44=UNI-COMP<br>45=UNICOMP TKS<br>46=UNIX<br>47=VANGUARD 48=ZUK |                                                                  |
| Tibial Fixation<br>(tibiafixation)               |  | Categorical | 1=Cement<br>2=Cementless                                       | Surgeon intraoperative-operative notes                           |
| Tibial Cement Type<br>(tibiacementtype)          |  | Binary      | 1=Plain<br>2=Antibiotic                                        | Surgeon intraoperative-operative notes                           |
| Bearing Type<br>(bearingtype)                    |  | Binary      | 1=Fixed<br>2=Mobile                                            | Electronic Medical Record - As per<br>manufacturer implant label |
| Constraint                                       |  |             |                                                                |                                                                  |
| Constrained Condylar<br>(constraint_condylar)    |  | Binary      | 0=No; 1=Yes                                                    |                                                                  |
| Cruciate Retaining<br>(constraint_cruc_retain)   |  | Binary      | 0=No; 1=Yes                                                    |                                                                  |
| Cruciate Sacrificing<br>(constraint_cruc_sacrif) |  | Binary      | 0=No; 1=Yes                                                    |                                                                  |
| Deep Dish<br>(constraint_deep_dish)              |  | Binary      | 0=No; 1=Yes                                                    |                                                                  |
| High flexion<br>(constraint_high_flex)           |  | Binary      | 0=No; 1=Yes                                                    |                                                                  |
| Hinge<br>(constraint_hinge)                      |  | Binary      | 0=No; 1=Yes                                                    |                                                                  |
| Medial Pivot<br>(constraint_med_pivot)           |  | Binary      | 0=No; 1=Yes                                                    |                                                                  |
| Other<br>(constraint_other)                      |  | Binary      | 0=No; 1=Yes                                                    |                                                                  |
| Posterior Stabilized<br>(constraint_post_stab)   |  | Binary      | 0=No; 1=Yes                                                    |                                                                  |
| Tumour<br>(constraint_tumour)                    |  | Binary      | 0=No; 1=Yes                                                    |                                                                  |

Version 5: 09/04/2020

### 3.2.5 Post-Operative Details

| Variable (code)                                                      | Collection Period | Type of Variable | Relevant definition/<br>mean (SD); range                                                                                                                                                                                          | Data Source(s)                                                                              |
|----------------------------------------------------------------------|-------------------|------------------|-----------------------------------------------------------------------------------------------------------------------------------------------------------------------------------------------------------------------------------|---------------------------------------------------------------------------------------------|
| Anticoagulation - Aspirin<br>(postopanticoag_aspirin)                |                   | Binary           | 0=No; 1=Yes                                                                                                                                                                                                                       | Medication Chart                                                                            |
| Anticoagulation - Combination<br>(postopanticoag_combination)        |                   | Binary           | 0=No; 1=Yes                                                                                                                                                                                                                       | Medication Chart                                                                            |
| Anticoagulation - LMWH<br>(postopanticoag_lmwh)                      |                   | Binary           | 0=No; 1=Yes                                                                                                                                                                                                                       | Medication Chart                                                                            |
| Anticoagulation - Other<br>(postopanticoag_other)                    |                   | Binary           | 0=No; 1=Yes                                                                                                                                                                                                                       | Medication Chart                                                                            |
| Anticoagulation - Warfarin<br>(postopanticoag_warfarin)              |                   | Binary           | 0=No; 1=Yes                                                                                                                                                                                                                       | Medication Chart                                                                            |
| DVT Prophylaxis - Anticoagulation<br>(postopdvt_anticoag)            |                   | Binary           | 0=No; 1=Yes                                                                                                                                                                                                                       | Patient Clinical Pathway                                                                    |
| DVT Prophylaxis - Anti-embolic<br>Stockings<br>(postopdvt_stockings) |                   | Binary           | 0=No; 1=Yes                                                                                                                                                                                                                       | Patient Clinical Pathway                                                                    |
| DVT Prophylaxis - Compression<br>Devices<br>(postopdvt_compdev)      |                   | Binary           | 0=No; 1=Yes                                                                                                                                                                                                                       | Patient Clinical Pathway                                                                    |
| DVT Prophylaxis - None<br>(postopdvt_none)                           |                   | Binary           | 0=No; 1=Yes                                                                                                                                                                                                                       | Patient Clinical Pathway                                                                    |
| DVT Prophylaxis - Other<br>(postopdvt_other)                         |                   | Binary           | 0=No; 1=Yes                                                                                                                                                                                                                       | Patient Clinical Pathway                                                                    |
| Analgesia<br>(analgesia)                                             |                   |                  | 1=Epidural<br>2=PCA<br>3=Local Infiltration<br>4=Intravenous Narcotic<br>5=Infusion Intramuscular narcotic<br>6=Oral Narcotic<br>7=Narcotic Patches<br>8=Intrathecal Narcotics<br>9=Femoral Nerve Block<br>10=Sciatic Nerve Block | Anaesthetic Chart, Recovery Room<br>Chart,<br>Medication Chart, Analgesia Infusion<br>Chart |

Version 5: 09/04/2020

|                                      |  |         |                                                                                                       |  |
|--------------------------------------|--|---------|-------------------------------------------------------------------------------------------------------|--|
|                                      |  |         | 11=Other Nerve Block<br>12=Oral Anti-inflammatories                                                   |  |
| Length of Stay [days] (lengthofstay) |  | Numeric | Preoperative mean (SD); range<br><br>TKA<br>5.4 (2.8); 1 to 99<br><br>THA<br>5.6 (3.9); 1 to 159 days |  |

3.3 Complications

- Any complication that results in a deviation from the clinical pathway, delay in length of stay, re-operation and readmission within 30 days of the index procedure. Beyond 30 days, any re-operation or readmission related to the index procedure.
- When complications are identified that are not yet in Socrates, they are added accordingly.
- Index Surgery – Clinical Pathway, Medical Record, Discharge Summary.
- Post Discharge – Review of Medical Record at Follow-up appointment at 6 weeks, 12 months, 2 years, 5 years 7 years 10 years
- Annual questionnaire +/- phone call.

| Variable (code)                                  | Collection Period | Type of Variable | Relevant definition/<br>mean (SD); range | Data Source(s) |
|--------------------------------------------------|-------------------|------------------|------------------------------------------|----------------|
| Occurrence of any complication (compsoccurrence) |                   | Binary           | 0=No; 1=Yes                              |                |
| Complication date of occurrence (compsdate)      |                   | Date             | dd/mm/yyyy                               |                |
| Intraoperative complication (complperiodintraop) |                   | Binary           | 0=No; 1=Yes                              |                |

3.3.1 Medical Complications

| Variable (code)                | Collection Period | Type of Variable | Relevant definition/<br>Mean (SD); range | Data Source(s)                                                                                        |
|--------------------------------|-------------------|------------------|------------------------------------------|-------------------------------------------------------------------------------------------------------|
| Acopia (comp_acopia)           |                   | Binary           | 0=No; 1=Yes                              |                                                                                                       |
| Acute Kidney injury (comp_aki) |                   | Binary           | 0=No; 1=Yes                              | Clinical Presentation – Diagnostic Confirmation (Medical Record, Blood markers, Physician Assessment) |

Version 5: 09/04/2020

|                                                      |  |        |             |                                                                                                            |
|------------------------------------------------------|--|--------|-------------|------------------------------------------------------------------------------------------------------------|
| Acute Myocardial Infarct<br>(comp_ami)               |  | Binary | 0=No; 1=Yes | Clinical Presentation – Diagnostic Confirmation (Medical Record, Blood markers, ECG, Physician Assessment) |
| Acute Pulmonary Oedema<br>(comp_apo)                 |  | Binary | 0=No; 1=Yes |                                                                                                            |
| Alcohol Withdrawal Syndrome<br>(comp_alc_withdrawal) |  | Binary | 0=No; 1=Yes |                                                                                                            |
| Anaemia<br>(comp_anaemia)                            |  | Binary | 0=No; 1=Yes |                                                                                                            |
| Angina<br>(comp_angina)                              |  | Binary | 0=No; 1=Yes | Clinical Presentation – Diagnostic Confirmation (Medical Record, Blood markers, ECG, Physician Assessment) |
| Anuria<br>(comp_anuria)                              |  | Binary | 0=No; 1=Yes |                                                                                                            |
| Apnoea<br>(comp_apnoeic)                             |  | Binary | 0=No; 1=Yes |                                                                                                            |
| Asthma exacerbation<br>(comp_exac_asthma)            |  | Binary | 0=No; 1=Yes |                                                                                                            |
| Asystole<br>(comp_asystole)                          |  | Binary | 0=No; 1=Yes | Medical Record, Physician Assessment                                                                       |
| Atelectasis<br>(comp_atelectasis)                    |  | Binary | 0=No; 1=Yes |                                                                                                            |
| Atrial Fibrillation<br>(comp_af)                     |  | Binary | 0=No; 1=Yes | Medical Record, Physician Assessment                                                                       |
| Bowel Obstruction<br>(comp_bowel_obs)                |  | Binary | 0=No; 1=Yes | Clinical Presentation – Diagnostic Confirmation (Medical Record, Imaging, Physician Assessment)            |
| Bowel Pseudo-Obstruction<br>(comp_pseudo_bowelob)    |  | Binary | 0=No; 1=Yes |                                                                                                            |
| Bradycardia<br>(comp_bradycardia)                    |  | Binary | 0=No; 1=Yes | Medical Record, Physician Assessment                                                                       |
| Cholecystitis<br>(comp_cholecystitis)                |  | Binary | 0=No; 1=Yes |                                                                                                            |
| Confusion<br>(comp_confusion)                        |  | Binary | 0=No; 1=Yes | Clinical Presentation – Medical Record                                                                     |

Version 5: 09/04/2020

|                                          |  |        |             |                                                                                                       |
|------------------------------------------|--|--------|-------------|-------------------------------------------------------------------------------------------------------|
| Congestive Cardiac Failure<br>(comp_ccf) |  | Binary | 0=No; 1=Yes |                                                                                                       |
| Cerebrovascular Accident<br>(comp_cva)   |  | Binary | 0=No; 1=Yes | Clinical Presentation – Diagnostic Confirmation (Medical Record, Imaging, Physician Assessment)       |
| Chest Infection<br>(chest_infection)     |  | Binary | 0=No; 1=Yes |                                                                                                       |
| Deranged LFT's<br>(comp_deranged_lfts)   |  | Binary | 0=No; 1=Yes | Clinical Presentation – Diagnostic Confirmation (Medical Record, Blood markers, Physician Assessment) |
| Diarrhoea<br>(comp_diarrhoea)            |  | Binary | 0=No; 1=Yes |                                                                                                       |
| Drug Reaction<br>(comp_drug_rxn)         |  | Binary | 0=No; 1=Yes | Medical Record, Physician Assessment                                                                  |
| Deep Vein Thrombosis<br>(comp_dvt)       |  | Binary | 0=No; 1=Yes | Clinical Presentation – Diagnostic Confirmation on Ultrasound                                         |
| Empyema<br>(comp_empyema)                |  | Binary | 0=No; 1=Yes | Medical Record, Imaging, Physician Assessment                                                         |
| Fall<br>(comp_fall)                      |  | Binary | 0=No; 1=Yes | Clinical Presentation; Medical Record                                                                 |
| Febrile<br>(comp_febrile)                |  | Binary | 0=No; 1=Yes |                                                                                                       |
| Fluid Overload<br>(comp_fluid_overload)  |  | Binary | 0=No; 1=Yes |                                                                                                       |
| GI Bleed<br>(comp_gi_bleeding)           |  | Binary | 0=No; 1=Yes | Clinical Presentation – Diagnostic Confirmation (Medical Record, Physician Assessment, Gastroscopy)   |
| Haematemesis<br>(comp_haematemesis)      |  | Binary | 0=No; 1=Yes |                                                                                                       |
| Haematuria<br>(comp_haematuria)          |  | Binary | 0=No; 1=Yes |                                                                                                       |
| Heart Block<br>(comp_heart_block)        |  | Binary | 0=No; 1=Yes |                                                                                                       |
| Hydronephrosis<br>(comp_hydronephrosis)  |  | Binary | 0=No; 1=Yes |                                                                                                       |
| Hyperglycaemia<br>(comp_hyperglycaemia)  |  | Binary | 0=No; 1=Yes |                                                                                                       |

Version 5: 09/04/2020

|                                                                                    |  |        |             |                                                                                                               |
|------------------------------------------------------------------------------------|--|--------|-------------|---------------------------------------------------------------------------------------------------------------|
| Hypertension<br>(comp_hypertension)                                                |  | Binary | 0=No; 1=Yes |                                                                                                               |
| Hypokalaemia<br>(comp_hypokalaemia)                                                |  | Binary | 0=No; 1=Yes | Medical Record, Blood markers,<br>Physician Assessment                                                        |
| Hyponatraemia<br>(comp_hyponatramia)                                               |  | Binary | 0=No; 1=Yes | Medical Record, Blood markers,<br>Physician Assessment                                                        |
| Hypotension<br>(comp_hypotension)                                                  |  | Binary | 0=No; 1=Yes |                                                                                                               |
| Hypoxia<br>(comp_hypoxia)                                                          |  | Binary | 0=No; 1=Yes |                                                                                                               |
| Intensive Care Unit (ICU) Admission<br>– Planned, for monitoring<br>(comp_icu_mon) |  | Binary | 0=No; 1=Yes |                                                                                                               |
| ICU Admission - Resulting from<br>Complication<br>(comp_icu_admission_comp)        |  | Binary | 0=No; 1=Yes |                                                                                                               |
| Ileus<br>(comp_ileus)                                                              |  | Binary | 0=No; 1=Yes |                                                                                                               |
| Lower Respiratory Tract Infection<br>(comp_lrti)                                   |  | Binary | 0=No; 1=Yes | Medical Record, Imaging, Physician<br>Assessment                                                              |
| Melaena<br>(comp_malaena)                                                          |  | Binary | 0=No; 1=Yes |                                                                                                               |
| Narcosed<br>(comp_narcosed)                                                        |  | Binary | 0=No; 1=Yes |                                                                                                               |
| Nausea<br>(comp_nausea)                                                            |  | Binary | 0=No; 1=Yes |                                                                                                               |
| Pericardial Effusion<br>(comp_peri_effusion)                                       |  | Binary | 0=No; 1=Yes |                                                                                                               |
| Pneumonia<br>(comp_pneumonia)                                                      |  | Binary | 0=No; 1=Yes | Medical Record, Imaging, Physician<br>Assessment                                                              |
| Pneumothorax<br>(comp_pneumothorax)                                                |  | Binary | 0=No; 1=Yes |                                                                                                               |
| Pressure Sore<br>(comp_pressure_sore)                                              |  | Binary | 0=No; 1=Yes | Clinical Presentation – Diagnostic<br>Confirmation (Medical Record, Braden<br>Scale for Pressure Injury Risk) |

Version 5: 09/04/2020

|                                               |  |        |             |                                                                                                         |
|-----------------------------------------------|--|--------|-------------|---------------------------------------------------------------------------------------------------------|
| Pulmonary Embolism (comp_pe)                  |  | Binary | 0=No; 1=Yes | Clinical Presentation – Diagnostic Confirmation (Confirmed on CT Pulmonary Angiogram)                   |
| Rapid Atrial Fibrillation (comp_rapid_af)     |  | Binary | 0=No; 1=Yes |                                                                                                         |
| Respiratory Depression (comp_resp_dep)        |  | Binary | 0=No; 1=Yes |                                                                                                         |
| Seizure (comp_seizure)                        |  | Binary | 0=No; 1=Yes |                                                                                                         |
| Sepsis (comp_sepsis)                          |  | Binary | 0=No; 1=Yes |                                                                                                         |
| Shingles (comp_shingles)                      |  | Binary | 0=No; 1=Yes |                                                                                                         |
| Supraventricular Tachycardia (comp_svt)       |  | Binary | 0=No; 1=Yes |                                                                                                         |
| Transient Ischaemic Attack (comp_tia)         |  | Binary | 0=No; 1=Yes |                                                                                                         |
| Upper Respiratory Tract Infection (comp_urti) |  | Binary | 0=No; 1=Yes | Medical Record, Imaging, Physician Assessment                                                           |
| Urinary Tract Infection (comp_uti)            |  | Binary | 0=No; 1=Yes | Clinical Presentation – Diagnostic Confirmation (Medical Record, Mid-Stream Urine Specimen)             |
| Urinary Retention (comp_urinary_ret)          |  | Binary | 0=No; 1=Yes | Clinical Presentation – Diagnostic Confirmation (Medical Record, Bladder Scanner, Physician Assessment) |
| Hydrocoele (comp_urinary_strict)              |  | Binary | 0=No; 1=Yes |                                                                                                         |
| Vasovagal Syncope (comp_vasovagal)            |  | Binary | 0=No; 1=Yes |                                                                                                         |

1

2

3.3.2 Surgical Complications

| Variable (code)                      | Collection Period | Type of Variable | Relevant definition/ mean (SD); range | Data Source(s)     |
|--------------------------------------|-------------------|------------------|---------------------------------------|--------------------|
| Arthrofibrosis (comp_arthrofibrosis) |                   | Binary           | 0=No; 1=Yes                           | Surgeon Assessment |

Version 5: 09/04/2020

|                                                                       |  |        |             |                                                                               |
|-----------------------------------------------------------------------|--|--------|-------------|-------------------------------------------------------------------------------|
| Aseptic Loosening<br>(comp_aseptic_loose)                             |  | Binary | 0=No; 1=Yes | Clinical Presentation – Diagnostic Confirmation (Surgeon Assessment, Imaging) |
| Aseptic Loosening Femoral Stem<br>(comp_al_femstem)                   |  | Binary | 0=No; 1=Yes | Clinical Presentation – Diagnostic Confirmation (Surgeon Assessment, Imaging) |
| Cement Extravasation<br>(comp_cement_extrav)                          |  | Binary | 0=No; 1=Yes |                                                                               |
| Compartment Syndrome<br>(comp_compartment_synd)                       |  | Binary | 0=No; 1=Yes |                                                                               |
| Discharge Delay - Slower than Clinical Pathway<br>(comp_dis_delay_pw) |  | Binary | 0=No; 1=Yes |                                                                               |
| Dislocation – Insert<br>(comp_disloc_insert)                          |  | Binary | 0=No; 1=Yes | Clinical Presentation – Diagnostic Confirmation (Surgeon Assessment, Imaging) |
| Dislocation – Patella<br>(comp_disloc_patella)                        |  | Binary | 0=No; 1=Yes | Clinical Presentation – Diagnostic Confirmation (Surgeon Assessment, Imaging) |
| Dislocation – Hip<br>(comp_disloc)                                    |  | Binary | 0=No; 1=Yes | Clinical Presentation – Diagnostic Confirmation (Surgeon Assessment, Imaging) |
| Drain Tube Incomplete Removal<br>(comp_tube_incomp)                   |  | Binary | 0=No; 1=Yes |                                                                               |
| Emergency Presentation<br>(comp_emerg_pres)                           |  | Binary | 0=No; 1=Yes |                                                                               |
| Fat Embolus<br>(comp_fat_embolus)                                     |  | Binary | 0=No; 1=Yes |                                                                               |
| Fixed Flexion Deformity<br>(comp_ffd)                                 |  | Binary | 0=No; 1=Yes | Surgeon Assessment                                                            |
| Foot Drop<br>(comp_foot_drop)                                         |  | Binary | 0=No; 1=Yes |                                                                               |
| Gout<br>(comp_gout)                                                   |  | Binary | 0=No; 1=Yes |                                                                               |
| Granuloma<br>(comp_granuloma)                                         |  | Binary | 0=No; 1=Yes |                                                                               |



Version 5: 09/04/2020

|                                                              |  |        |             |                                                                                    |
|--------------------------------------------------------------|--|--------|-------------|------------------------------------------------------------------------------------|
| Haemarthrosis<br>(comp_haemarthrosis)                        |  | Binary | 0=No; 1=Yes |                                                                                    |
| Haematoma<br>(comp_epi_haematoma)                            |  | Binary | 0=No; 1=Yes |                                                                                    |
| Fracture - Acetabulum<br>(comp_fract_acetab)                 |  | Binary | 0=No; 1=Yes | Clinical Presentation – Diagnostic Confirmation (Surgeon Operative Notes, Imaging) |
| Fracture - Ankle<br>(comp_fracture_ankle)                    |  | Binary | 0=No; 1=Yes | Clinical Presentation – Diagnostic Confirmation (Surgeon Operative Notes, Imaging) |
| Fracture - Calcaneus<br>(comp_fract_calcar)                  |  | Binary | 0=No; 1=Yes | Clinical Presentation – Diagnostic Confirmation (Surgeon Operative Notes, Imaging) |
| Fracture - Femoral Condyle<br>(comp_frac_femcond)            |  | Binary | 0=No; 1=Yes | Clinical Presentation – Diagnostic Confirmation (Surgeon Operative Notes, Imaging) |
| Fracture - Femur<br>(comp_fracture_femur)                    |  | Binary | 0=No; 1=Yes | Clinical Presentation – Diagnostic Confirmation (Surgeon Operative Notes, Imaging) |
| Fracture - Greater Trochanter<br>(comp_fract_greattroch)     |  | Binary | 0=No; 1=Yes | Clinical Presentation – Diagnostic Confirmation (Surgeon Operative Notes, Imaging) |
| Fracture - Orbital<br>(comp_fract_orb)                       |  | Binary | 0=No; 1=Yes | Clinical Presentation – Diagnostic Confirmation (Surgeon Operative Notes, Imaging) |
| Fracture - Patella<br>(comp_fract_pat)                       |  | Binary | 0=No; 1=Yes | Clinical Presentation – Diagnostic Confirmation (Surgeon Operative Notes, Imaging) |
| Fracture - Periacetabular<br>(comp_fract_periacetab)         |  | Binary | 0=No; 1=Yes | Clinical Presentation – Diagnostic Confirmation (Surgeon Operative Notes, Imaging) |
| Fracture - Periprosthetic<br>(comp_fract_peri_pros)          |  | Binary | 0=No; 1=Yes | Clinical Presentation – Diagnostic Confirmation (Surgeon Operative Notes, Imaging) |
| Fracture – Superior rim of acetabulum<br>(comp_fract_suprim) |  | Binary | 0=No; 1=Yes | Clinical Presentation – Diagnostic Confirmation (Surgeon Operative Notes, Imaging) |
| Fracture - Tibia<br>(comp_fracture_tibia)                    |  | Binary | 0=No; 1=Yes | Clinical Presentation – Diagnostic Confirmation (Surgeon Operative Notes, Imaging) |

Version 5: 09/04/2020

|                                                                                     |  |        |             |                                                                                                          |
|-------------------------------------------------------------------------------------|--|--------|-------------|----------------------------------------------------------------------------------------------------------|
| Fracture - Tibial Plateau<br>(comp_frac_tib_plat)                                   |  | Binary | 0=No; 1=Yes | Clinical Presentation – Diagnostic Confirmation (Surgeon Operative Notes, Imaging)                       |
| Instability<br>(comp_instability)                                                   |  | Binary | 0=No; 1=Yes | Clinical Presentation – Diagnostic Confirmation (Surgeon Assessment, Imaging)                            |
| Prosthetic Joint Infection – Acute<br>(comp_joint_infection_acute)                  |  | Binary | 0=No; 1=Yes | Clinical Presentation – Diagnostic Confirmation<br>CDC Definitions<br>Surgeon Assessment, medical record |
| Prosthetic Joint Infection - Latent<br>(comp_jt_inf_latent)                         |  | Binary | 0=No; 1=Yes | Clinical Presentation – Diagnostic Confirmation<br>CDC Definitions<br>Surgeon Assessment, medical record |
| Prosthetic Joint Infection - Haematogenous<br>(comp_jt_infection_haematogenous)     |  | Binary | 0=No; 1=Yes | Clinical Presentation – Diagnostic Confirmation<br>CDC Definitions<br>Surgeon Assessment, medical record |
| Laceration of Soft Palate<br>(comp_lacer_softpalate)                                |  | Binary | 0=No; 1=Yes |                                                                                                          |
| Neuropraxia<br>(comp_neuropraxia)                                                   |  | Binary | 0=No; 1=Yes | Physician Assessment, Nurse Assessment                                                                   |
| Pain<br>(comp_pain)                                                                 |  | Binary | 0=No; 1=Yes | Surgeon Assessment                                                                                       |
| Patella Loosening<br>(comp_asceploose_pat)                                          |  | Binary | 0=No; 1=Yes | (Surgeon Assessment, Imaging)                                                                            |
| Poor Range of Motion<br>(comp_poor_rom)                                             |  | Binary | 0=No; 1=Yes | Surgeon Assessment                                                                                       |
| Retained Drain Tube<br>(comp_ret_draintube)                                         |  | Binary | 0=No; 1=Yes | Surgeon Assessment                                                                                       |
| Stiffness<br>(comp_stiffness)                                                       |  | Binary | 0=No; 1=Yes | Surgeon Assessment                                                                                       |
| Swelling<br>(comp_swelling)                                                         |  | Binary | 0=No; 1=Yes | Surgeon Assessment                                                                                       |
| Tendon/Ligament Rupture – Medial Collateral Ligament Rupture<br>(comp_ruptured_mcl) |  | Binary | 0=No; 1=Yes | Clinical Presentation – Diagnostic Confirmation<br>(Surgeon Assessment, Imaging)                         |

Version 5: 09/04/2020

|                                                                |  |        |             |                                                                      |
|----------------------------------------------------------------|--|--------|-------------|----------------------------------------------------------------------|
| Tendon/Ligament Rupture – Patella Tendon<br>(comp_pat_ten_rup) |  | Binary | 0=No; 1=Yes | Clinical Presentation – Diagnostic Confirmation                      |
| Tendon/Ligament Rupture – Quadriceps<br>(comp_ruptured_quad)   |  | Binary | 0=No; 1=Yes | (Surgeon Assessment, Imaging)                                        |
| Popliteal Artery Injury<br>(comp_pop_artinjury)                |  | Binary | 0=No; 1=Yes | Clinical Presentation – Diagnostic Confirmation (Surgeon Assessment) |

1

2

### 3.3.3 Wound Complications

| Variable (code)                                                 | Collection Period | Type of Variable | Relevant definition/<br>Mean (SD); range | Data Source(s)                                                                                           |
|-----------------------------------------------------------------|-------------------|------------------|------------------------------------------|----------------------------------------------------------------------------------------------------------|
| Cellulitis<br>(comp_cellulitis)                                 |                   | Binary           | 0=No; 1=Yes                              | Clinical Presentation, Surgeon Assessment, medical record                                                |
| Blisters<br>(comp_blisters)                                     |                   | Binary           | 0=No; 1=Yes                              | Clinical Assessment, medical record                                                                      |
| Erythema<br>(comp_erythema)                                     |                   | Binary           | 0=No; 1=Yes                              | Clinical Assessment, medical record                                                                      |
| Wound Problem: Other<br>(comp_wound_prob_other)                 |                   | Binary           | 0=No; 1=Yes                              | Clinical Presentation, Surgeon Assessment, medical record                                                |
| Stitch abscess<br>(comp_stitch_abscess)                         |                   | Binary           | 0=No; 1=Yes                              | Clinical Assessment, medical record                                                                      |
| Surgical site infection - Deep<br>(comp_infection_deep)         |                   | Binary           | 0=No; 1=Yes                              | Clinical Presentation – Diagnostic Confirmation<br>CDC Definitions<br>Surgeon Assessment, medical record |
| Surgical site infection - Superficial<br>(comp_infect_superfic) |                   | Binary           | 0=No; 1=Yes                              | Clinical Presentation – Diagnostic Confirmation<br>CDC Definitions<br>Surgeon Assessment, medical record |
| Wound dehiscence<br>(comp_dehiscence)                           |                   | Binary           | 0=No; 1=Yes                              | Clinical Assessment, medical record                                                                      |
| Wound Haematoma<br>(comp_wound_haematoma)                       |                   | Binary           | 0=No; 1=Yes                              | Clinical Presentation, Surgeon Assessment, medical record                                                |
| Wound ooze<br>(comp_wound_ooze)                                 |                   | Binary           | 0=No; 1=Yes                              | Clinical Assessment, medical record                                                                      |

43

Version 5: 09/04/2020

|                                    |  |        |             |                                     |
|------------------------------------|--|--------|-------------|-------------------------------------|
| Wound necrosis<br>(comp_wound_nec) |  | Binary | 0=No; 1=Yes | Clinical Assessment, medical record |
|------------------------------------|--|--------|-------------|-------------------------------------|

1

2

### 3.3.4 Revisions, Readmissions, and Reoperations

| Variable (code)                                                            | Collection Period | Type of Variable | Relevant definition/<br>mean (SD); range | Data Source(s) |
|----------------------------------------------------------------------------|-------------------|------------------|------------------------------------------|----------------|
| Additional Procedure – Manipulation Under Anaesthesia<br>(addproc_mua)     |                   | Binary           | 0=No; 1=Yes                              |                |
| Additional Procedure – Washout x1<br>(addproc_washout_x1)                  |                   | Binary           | 0=No; 1=Yes                              |                |
| Additional Procedure – Washout x2<br>(addproc_washout_x2)                  |                   | Binary           | 0=No; 1=Yes                              |                |
| Additional Procedure – Washout x3<br>(addproc_washout_x3)                  |                   | Binary           | 0=No; 1=Yes                              |                |
| Additional Procedure – Change of Liner<br>(addproc_chgliner)               |                   | Binary           | 0=No; 1=Yes                              |                |
| Additional Procedure – Arthroscopy<br>(addproc_arthroscope)                |                   | Binary           | 0=No; 1=Yes                              |                |
| Additional Procedure – Joint Aspiration<br>(addproc_aspiration)            |                   | Binary           | 0=No; 1=Yes                              |                |
| Additional Procedure – Patella Resurfacing<br>(addproc_patresurf)          |                   | Binary           | 0=No; 1=Yes                              |                |
| Additional Procedure – Revision<br>(addproc_revtotal)                      |                   | Binary           | 0=No; 1=Yes                              |                |
| Additional Procedure – Debridement<br>(addproc_debride)                    |                   | Binary           | 0=No; 1=Yes                              |                |
| Additional Procedure – Removal of Prosthesis<br>(addproc_removpros)        |                   | Binary           | 0=No; 1=Yes                              |                |
| Additional Procedure – Revision of Tibial Component<br>(addproc_revtibial) |                   | Binary           | 0=No; 1=Yes                              |                |

44

Version 5: 09/04/2020

|                                                                                   |  |        |             |  |
|-----------------------------------------------------------------------------------|--|--------|-------------|--|
| Additional Procedure – Gastroscopy<br>(addproc_gastroscopy)                       |  | Binary | 0=No; 1=Yes |  |
| Additional Procedure – Resuturing<br>(addproc_resuturing)                         |  | Binary | 0=No; 1=Yes |  |
| Additional Procedure – Open<br>Reduction Internal Fixation<br>(addproc_orif)      |  | Binary | 0=No; 1=Yes |  |
| Additional Procedure – Angiogram<br>(addproc_angiogram)                           |  | Binary | 0=No; 1=Yes |  |
| Additional Procedure – 2 Stage<br>Revision<br>(addproc_2stagerev)                 |  | Binary | 0=No; 1=Yes |  |
| Additional Procedure – Pacemaker<br>Insertion<br>(addproc_pacemaker)              |  | Binary | 0=No; 1=Yes |  |
| Additional Procedure – Cystoscopy<br>(addproc_cystoscopy)                         |  | Binary | 0=No; 1=Yes |  |
| Additional Procedure – Repair<br>ruptured quadriceps<br>(addproc_rupquads)        |  | Binary | 0=No; 1=Yes |  |
| Additional Procedure – Biopsy<br>(addproc_biopsy)                                 |  | Binary | 0=No; 1=Yes |  |
| Additional Procedure -Removal of<br>Retained Drain Tube<br>(addproc_retdraintube) |  | Binary | 0=No; 1=Yes |  |
| Additional Procedure – Vac Dressing<br>(addproc_vacdress)                         |  | Binary | 0=No; 1=Yes |  |
| Additional Procedure – Removal of<br>Excess Cement<br>(addproc_excesscement)      |  | Binary | 0=No; 1=Yes |  |
| Date of Reoperation<br>(reoperationdate)                                          |  | Date   | dd/mm/yyyy  |  |
| Date of Revision Surgery<br>(revisiondate)                                        |  | Date   | 0=No; 1=Yes |  |
| Readmission Occurrence<br>(readmitted)                                            |  | Binary | 0=No; 1=Yes |  |
| Readmission Medical Complication<br>(comp_readmission_med_comp)                   |  | Binary | 0=No; 1=Yes |  |

Version 5: 09/04/2020

|                                                           |  |        |             |                                                                               |
|-----------------------------------------------------------|--|--------|-------------|-------------------------------------------------------------------------------|
| Readmission Surgical Complication (comp_readmission_surg) |  | Binary | 0=No; 1=Yes |                                                                               |
| Readmission: Wound-Related (comp_ra_wound)                |  | Binary | 0=No; 1=Yes |                                                                               |
| Reoperation Occurrence (reoperation)                      |  | Binary | 0=No; 1=Yes |                                                                               |
| Revision Occurrence (revision)                            |  | Binary | 0=No; 1=Yes | Clinical Presentation – Diagnostic Confirmation (Surgeon Assessment, Imaging) |

3.4 Patient-Reported Outcome Measures

The Harris Hip Score (HHS) was developed to assess the results of hip surgery and contains 10 items covering the domains of pain (1 item, 0-44 points), function (7 items, 0-47 points), absence of deformity (1 item, 4 points), and range of motion (2 items, 5 points).<sup>24</sup> The maximum score is 100 points, with higher scores indicating a better outcome.

The Knee Society Score 2011 (KSS) contains both patient-reported and surgeon-reported components from which a knee score (0-100) and a function score (0-100) are derived.<sup>22</sup> A higher score indicates a better outcome.

Global physical and psychological health status was assessed using the Veterans RAND 12-item Health Survey (VR-12), with a higher score indicating better quality of life.<sup>20</sup> From 01/01/2006 to 30/04/2014, the Short Form 12 (SF-12) was collected.<sup>21</sup> From 01/05/2014, SF-12 collection was replaced by VR-12. Questions and responses are near identical for SF-12 and VR-12, and the SF-12 scores were converted to VR-12 scores.

The Western Ontario and McMaster Universities Osteoarthritis Index (WOMAC) is a multidimensional, self-administered outcome measure that consists of 24 items covering 3 subscales: pain (range 0-20), stiffness (range 0-8), and physical function (0- 68). It is validated, reliable, sensitive to change, and proven to be a responsive instrument for THA and TKA.<sup>14-19</sup>

| Variable (code)             | Collection Period        | Type of Variable | Relevant definition/ mean (SD); range | Data Source(s)                                                                                                                            |
|-----------------------------|--------------------------|------------------|---------------------------------------|-------------------------------------------------------------------------------------------------------------------------------------------|
| Harris Hip Score (HHS)      |                          |                  |                                       |                                                                                                                                           |
| HHS Follow-Up (hhsfollowup) | 01/01/2006 to 31/12/2011 | Binary           | 0=No; 1=Yes                           | Mail out and follow-up phone call<br>Follow-up:<br>1. Pre-operative<br>2. Annually to 5 years<br>3. 7 years, 10 years, 15 years, 20 years |
| HHS Pain (hhspain)          | 01/01/2006 to 31/12/2011 | Categorical      | 1=No pain<br>2=Slight                 | Mail out and follow-up phone call<br>Follow-up:                                                                                           |

Version 5: 09/04/2020

|                                                    |                             |             |                                                                                                                                         |                                                                                                                                           |
|----------------------------------------------------|-----------------------------|-------------|-----------------------------------------------------------------------------------------------------------------------------------------|-------------------------------------------------------------------------------------------------------------------------------------------|
|                                                    |                             |             | 3=Mild<br>4=Moderate<br>5=Severe<br>6=Disabled                                                                                          | 1. Pre-operative<br>2. Annually to 5 years<br>3. 7 years, 10 years, 15 years, 20 years                                                    |
| <b>HHS Limp<br/>(hhslimp)</b>                      | 01/01/2006 to<br>31/12/2011 | Categorical | 1=Not at all<br>2=Slight<br>3=Moderate<br>4=Severe                                                                                      | Mail out and follow-up phone call<br>Follow-up:<br>1. Pre-operative<br>2. Annually to 5 years<br>3. 7 years, 10 years, 15 years, 20 years |
| <b>HHS Support<br/>(hhssupport)</b>                | 01/01/2006 to<br>31/12/2011 | Categorical | 1=None<br>2=Stick (for long walk)<br>3=Stick all the time<br>4=One crutch<br>5=Two sticks<br>6=Walker, two crutches or unable to walk   | Mail out and follow-up phone call<br>Follow-up:<br>1. Pre-operative<br>2. Annually to 5 years<br>3. 7 years, 10 years, 15 years, 20 years |
| <b>HHS Distance Walked<br/>(hhsdistancewalked)</b> | 01/01/2006 to<br>31/12/2011 | Categorical | 1=Unlimited<br>2=Six blocks or >30 minutes<br>3=Two or three blocks or > 15 minutes<br>4=Indoors only<br>5=Cannot walk – use wheelchair | Mail out and follow-up phone call<br>Follow-up:<br>1. Pre-operative<br>2. Annually to 5 years<br>3. 7 years, 10 years, 15 years, 20 years |
| <b>HHS Stairs<br/>(hhsstairs)</b>                  | 01/01/2006 to<br>31/12/2011 | Categorical | 1=Normally<br>2=Using banisters<br>3=Able to use some method<br>4=Unable to climb stairs                                                | Mail out and follow-up phone call<br>Follow-up:<br>1. Pre-operative<br>2. Annually to 5 years<br>3. 7 years, 10 years, 15 years, 20 years |
| <b>HHS Shoes and Socks<br/>(hhsshoesandsocks)</b>  | 01/01/2006 to<br>31/12/2011 | Categorical | 1=With ease<br>2=With difficulty<br>3=Unable put on shoes and socks                                                                     | Mail out and follow-up phone call<br>Follow-up:<br>1. Pre-operative<br>2. Annually to 5 years<br>3. 7 years, 10 years, 15 years, 20 years |
| <b>HHS Sitting<br/>(hhssitting)</b>                | 01/01/2006 to<br>31/12/2011 | Categorical | 1=On any chair<br>2=On a high<br>3=Unable to sit for more than half an hour                                                             | Mail out and follow-up phone call<br>Follow-up:<br>1. Pre-operative<br>2. Annually to 5 years<br>3. 7 years, 10 years, 15 years, 20 years |
| <b>HHS Transport<br/>(hhstransport)</b>            | 01/01/2006 to<br>31/12/2011 | Categorical | 1=Easily<br>2=Able to but not easily<br>3=Unable                                                                                        | Mail out and follow-up phone call<br>Follow-up:<br>1. Pre-operative<br>2. Annually to 5 years<br>3. 7 years, 10 years, 15 years, 20 years |

Version 5: 09/04/2020

|                                                                                           |                             |             |                                                     |                                                                                                                                           |
|-------------------------------------------------------------------------------------------|-----------------------------|-------------|-----------------------------------------------------|-------------------------------------------------------------------------------------------------------------------------------------------|
| <b>HHS Degrees of Flexion<br/>(hhsabsdefflexion)</b>                                      | 01/01/2006 to<br>31/12/2011 | Categorical | 0=No; 1=Yes                                         | Mail out and follow-up phone call<br>Follow-up:<br>1. Pre-operative<br>2. Annually to 5 years<br>3. 7 years, 10 years, 15 years, 20 years |
| <b>HHS Degrees of Adduction<br/>(hhsabsdefadduct)</b>                                     | 01/01/2006 to<br>31/12/2011 | Categorical | 0=No; 1=Yes                                         | Mail out and follow-up phone call<br>Follow-up:<br>1. Pre-operative<br>2. Annually to 5 years<br>3. 7 years, 10 years, 15 years, 20 years |
| <b>HHS Degrees of Rotation<br/>(hhsabsdefrot)</b>                                         | 01/01/2006 to<br>31/12/2011 | Categorical | 0=No; 1=Yes                                         | Mail out and follow-up phone call<br>Follow-up:<br>1. Pre-operative<br>2. Annually to 5 years<br>3. 7 years, 10 years, 15 years, 20 years |
| <b>HHS Limb Length Discrepancy<br/>(hhsabsdeflldisc)</b>                                  | 01/01/2006 to<br>31/12/2011 | Categorical | 0=No; 1=Yes                                         | Mail out and follow-up phone call<br>Follow-up:<br>1. Pre-operative<br>2. Annually to 5 years<br>3. 7 years, 10 years, 15 years, 20 years |
| <b>HHS Range of Motion – Flexion<br/>[degrees]<br/>(hhsromflexion)</b>                    | 01/01/2006 to<br>31/12/2011 | Numeric     | Preoperative mean (SD); range<br>80 (20); 0 to 140  | Mail out and follow-up phone call<br>Follow-up:<br>1. Pre-operative<br>2. Annually to 5 years<br>3. 7 years, 10 years, 15 years, 20 years |
| <b>HHS Range of Motion – Extension<br/>[degrees]<br/>(hhsromextension)</b>                | 01/01/2006 to<br>31/12/2011 | Numeric     | Preoperative mean (SD); range<br>6 (12); 0 to 60    | Mail out and follow-up phone call<br>Follow-up:<br>1. Pre-operative<br>2. Annually to 5 years<br>3. 7 years, 10 years, 15 years, 20 years |
| <b>HHS Range of Motion – Abduction<br/>[degrees]<br/>(hhsromabduction)</b>                | 01/01/2006 to<br>31/12/2011 | Numeric     | Preoperative mean (SD); range<br>16 (15); -15 to 80 | Mail out and follow-up phone call<br>Follow-up:<br>1. Pre-operative<br>2. Annually to 5 years<br>3. 7 years, 10 years, 15 years, 20 years |
| <b>HHS Range of Motion – External<br/>Rotation [degrees]<br/>(hhsromexternalrotation)</b> | 01/01/2006 to<br>31/12/2011 | Numeric     | Preoperative mean (SD); range<br>11 (12); -30 to 80 | Mail out and follow-up phone call<br>Follow-up:<br>1. Pre-operative<br>2. Annually to 5 years<br>3. 7 years, 10 years, 15 years, 20 years |



Version 5: 09/04/2020

|                                                                                   |                          |         |                                                   |                                                                                                                                           |
|-----------------------------------------------------------------------------------|--------------------------|---------|---------------------------------------------------|-------------------------------------------------------------------------------------------------------------------------------------------|
| <b>HHS Range of Motion – Internal Rotation [degrees] (hhsrominternalrotation)</b> | 01/01/2006 to 31/12/2011 | Numeric | Preoperative mean (SD); range<br>3 (8); -45 to 60 | Mail out and follow-up phone call<br>Follow-up:<br>1. Pre-operative<br>2. Annually to 5 years<br>3. 7 years, 10 years, 15 years, 20 years |
| <b>HHS Range of Motion – Adduction [degrees] (hhsromadduct)</b>                   | 01/01/2006 to 31/12/2011 | Numeric | Preoperative mean (SD); range<br>6 (8); -25 to 45 | Mail out and follow-up phone call<br>Follow-up:<br>1. Pre-operative<br>2. Annually to 5 years<br>3. 7 years, 10 years, 15 years, 20 years |
| <b>HHS Pain Score (hhs painscore)</b>                                             | 01/01/2006 to 31/12/2011 | Numeric | Preoperative mean (SD); range<br>12 (7); 0 to 44  | Mail out and follow-up phone call<br>Follow-up:<br>1. Pre-operative<br>2. Annually to 5 years<br>3. 7 years, 10 years, 15 years, 20 years |
| <b>HHS Gait Score (hhs gait score)</b>                                            | 01/01/2006 to 31/12/2011 | Numeric | Preoperative mean (SD); range<br>12 (8); 0 to 33  | Mail out and follow-up phone call<br>Follow-up:<br>1. Pre-operative<br>2. Annually to 5 years<br>3. 7 years, 10 years, 15 years, 20 years |
| <b>HHS Activities Score (hhs activities score)</b>                                | 01/01/2006 to 31/12/2011 | Numeric | Preoperative mean (SD); range<br>8 (5); 0 to 47   | Mail out and follow-up phone call<br>Follow-up:<br>1. Pre-operative<br>2. Annually to 5 years<br>3. 7 years, 10 years, 15 years, 20 years |
| <b>HHS Deformity Score (hhs deformity score)</b>                                  | 01/01/2006 to 31/12/2011 | Numeric | Preoperative mean (SD); range<br>3 (1); 0 to 4    | Mail out and follow-up phone call<br>Follow-up:<br>1. Pre-operative<br>2. Annually to 5 years<br>3. 7 years, 10 years, 15 years, 20 years |
| <b>HHS Range of Motion Score (hhs rom score)</b>                                  | 01/01/2006 to 31/12/2011 | Numeric | Preoperative mean (SD); range<br>4 (1); 0 to 5    | Mail out and follow-up phone call<br>Follow-up:<br>1. Pre-operative<br>2. Annually to 5 years<br>3. 7 years, 10 years, 15 years, 20 years |
| <b>HHS Total Score (hhs total score)</b>                                          | 01/01/2006 to 31/12/2011 | Numeric | Preoperative mean (SD); range<br>39 (14); 5 to 94 | Mail out and follow-up phone call<br>Follow-up:<br>1. Pre-operative<br>2. Annually to 5 years<br>3. 7 years, 10 years, 15 years, 20 years |

Version 5: 09/04/2020

| Knee Society Score (KSS)                                  |                             |             |                                                                           |                                                                                                                                           |
|-----------------------------------------------------------|-----------------------------|-------------|---------------------------------------------------------------------------|-------------------------------------------------------------------------------------------------------------------------------------------|
| KSS Follow-Up<br>(kssfollowup)                            | 01/01/2006 to<br>31/12/2011 | Binary      | 0=No; 1=Yes                                                               | Mail out and follow-up phone call<br>Follow-up:<br>1. Pre-operative<br>2. Annually to 5 years<br>3. 7 years, 10 years, 15 years, 20 years |
| KSS Range of Motion [degrees]<br>(kssrom)                 | 01/01/2006 to<br>31/12/2011 | Numeric     | 105 (16); 0 to 155                                                        | Mail out and follow-up phone call<br>Follow-up:<br>1. Pre-operative<br>2. Annually to 5 years<br>3. 7 years, 10 years, 15 years, 20 years |
| KSS Extension Lag [degrees]<br>(kssexlag)                 | 01/01/2006 to<br>31/12/2011 | Categorical | 1=<10<br>2=10-20<br>3=>20                                                 | Mail out and follow-up phone call<br>Follow-up:<br>1. Pre-operative<br>2. Annually to 5 years<br>3. 7 years, 10 years, 15 years, 20 years |
| KSS Flexion Contracture [degrees]<br>(kssflexcontracture) | 01/01/2006 to<br>31/12/2011 | Categorical | 1=5-10<br>2=10-15<br>3=16-20<br>4=>20                                     | Mail out and follow-up phone call<br>Follow-up:<br>1. Pre-operative<br>2. Annually to 5 years<br>3. 7 years, 10 years, 15 years, 20 years |
| KSS Mediolateral Stability [degrees]<br>(kssmlstability)  | 01/01/2006 to<br>31/12/2011 | Categorical | 1=<5<br>2=6-9<br>3=10-14<br>4=15                                          | Mail out and follow-up phone call<br>Follow-up:<br>1. Pre-operative<br>2. Annually to 5 years<br>3. 7 years, 10 years, 15 years, 20 years |
| KSS Antero-Posterior Stability [mm]<br>(kssapstability)   | 01/01/2006 to<br>31/12/2011 | Categorical | 1=<5<br>2=5-10<br>3=>10                                                   | Mail out and follow-up phone call<br>Follow-up:<br>1. Pre-operative<br>2. Annually to 5 years<br>3. 7 years, 10 years, 15 years, 20 years |
| KSS Alignment [degrees]<br>(kssalignment)                 | 01/01/2006 to<br>31/12/2011 | Categorical | 0 = 1<br>1 = 1<br>2 = 2<br>3 = 3<br>4 = 4<br>5 = 5-10<br>6 = 11<br>7 = 12 | Mail out and follow-up phone call<br>Follow-up:<br>1. Pre-operative<br>2. Annually to 5 years<br>3. 7 years, 10 years, 15 years, 20 years |

Version 5: 09/04/2020

|                                                              |                             |             |                                                                             |                                                                                                                                                        |
|--------------------------------------------------------------|-----------------------------|-------------|-----------------------------------------------------------------------------|--------------------------------------------------------------------------------------------------------------------------------------------------------|
|                                                              |                             |             | 8=13<br>9=4<br>10=15<br>11=>15                                              |                                                                                                                                                        |
| <b>KSS Knee Score<br/>(ksskneescore)</b>                     | 01/01/2006 to<br>31/12/2011 | Numeric     | Preoperative mean (SD); range<br>37 (12); 0 to 97                           | Mail out and follow-up phone call<br>Follow-up:<br>1. Pre-operative<br>2. Annually to 5 years<br>3. 7 years, 10 years, 15 years, 20 years              |
| <b>KSS Functional Score<br/>(kssfunctionalscore)</b>         | 01/01/2006 to<br>31/12/2011 | Numeric     | Preoperative mean (SD); range<br>38 (21); 0 to 100                          | Mail out and follow-up phone call<br>Follow-up:<br>1. Pre-operative<br>2. Annually to 5 years<br>3. 7 years, 10 years, 15 years, 20 years              |
| <b>Veterans Rand (VR12)</b>                                  |                             |             |                                                                             |                                                                                                                                                        |
| <b>VR12 Follow-Up<br/>(vr12followup)</b>                     | 01/05/2014 –                | Binary      | 0=No; 1=Yes                                                                 | Mail out and follow-up phone call<br>Follow-up:<br>1. Pre-operative<br>2. 3 or 6 months<br>3. 1 year, 2 years, 5 years, 7 years, 10 years and 15 years |
| <b>VR12 General Health<br/>(vr12generalhealth)</b>           | 01/05/2014 –                | Categorical | 5=Poor<br>4=Fair<br>3=Good<br>2=Very good<br>1=Excellent                    | Mail out and follow-up phone call<br>Follow-up:<br>1. Pre-operative<br>2. 3 or 6 months<br>3. 1 year, 2 years, 5 years, 7 years, 10 years and 15 years |
| <b>VR12 Moderate Activities<br/>(vr12moderateactivities)</b> | 01/05/2014 –                | Categorical | 1=Yes, limited a lot<br>2=Yes, limited a little<br>3=No, not limited at all | Mail out and follow-up phone call<br>Follow-up:<br>1. Pre-operative<br>2. 3 or 6 months<br>3. 1 year, 2 years, 5 years, 7 years, 10 years and 15 years |
| <b>VR12 Climbing Several Stairs<br/>(vr12climbingstairs)</b> | 01/05/2014 –                | Categorical | 1=Yes, limited a lot<br>2=Yes, limited a little<br>3=No, not limited at all | Mail out and follow-up phone call<br>Follow-up:<br>1. Pre-operative<br>2. 3 or 6 months<br>3. 1 year, 2 years, 5 years, 7 years, 10 years and 15 years |

Version 5: 09/04/2020

|                                                                                     |              |             |                                                                                                                                           |                                                                                                                                                        |
|-------------------------------------------------------------------------------------|--------------|-------------|-------------------------------------------------------------------------------------------------------------------------------------------|--------------------------------------------------------------------------------------------------------------------------------------------------------|
| <b>VR12 Accomplished Less Due To Physical Problems<br/>(vr12physicalhealthless)</b> | 01/05/2014 – | Categorical | 1=No, none of the time<br>2=Yes, a little of the time<br>3=Yes, some of the time<br>4=Yes, most of the time<br>5=Yes, all of the time     | Mail out and follow-up phone call<br>Follow-up:<br>1. Pre-operative<br>2. 3 or 6 months<br>3. 1 year, 2 years, 5 years, 7 years, 10 years and 15 years |
| <b>VR12 Limited Due To Physical Problems<br/>(vr12physhlthlimwork)</b>              | 01/05/2014 – | Categorical | 1=No, none of the time<br>2=Yes, a little of the time<br>3=Yes, some of the time<br>4=Yes, most of the time<br>5=Yes, all of the time     | Mail out and follow-up phone call<br>Follow-up:<br>1. Pre-operative<br>2. 3 or 6 months<br>3. 1 year, 2 years, 5 years, 7 years, 10 years and 15 years |
| <b>VR12 Accomplished Less Due To Emotional Problems<br/>(vr12emotproblemsless)</b>  | 01/05/2014 – | Categorical | 1=No, none of the time<br>2=Yes, a little of the time<br>3=Yes, some of the time<br>4=Yes, most of the time<br>5=Yes, all of the time     | Mail out and follow-up phone call<br>Follow-up:<br>1. Pre-operative<br>2. 3 or 6 months<br>3. 1 year, 2 years, 5 years, 7 years, 10 years and 15 years |
| <b>VR12 Limited Due To Emotional Problems<br/>(vr12emotproblemslimwork)</b>         | 01/05/2014 – | Categorical | 1=No, none of the time<br>2=Yes, a little of the time<br>3=Yes, some of the time<br>4=Yes, most of the time<br>5=Yes, all of the time     | Mail out and follow-up phone call<br>Follow-up:<br>1. Pre-operative<br>2. 3 or 6 months<br>3. 1 year, 2 years, 5 years, 7 years, 10 years and 15 years |
| <b>Vr12 Pain Interference<br/>(vr12paininterference)</b>                            | 01/05/2014 – | Categorical | 1=Not at all<br>2=A little bit<br>3=Moderately<br>4=Quite a bit<br>5=Extremely                                                            | Mail out and follow-up phone call<br>Follow-up:<br>1. Pre-operative<br>2. 3 or 6 months<br>3. 1 year, 2 years, 5 years, 7 years, 10 years and 15 years |
| <b>VR12 Feeling Peaceful<br/>(vr12feelcalmpeace)</b>                                | 01/05/2014 – | Categorical | 1=All of the time<br>2=Most of the time<br>3=A good bit of the time<br>4=Some of the time<br>5=A little of the time<br>6=None of the time | Mail out and follow-up phone call<br>Follow-up:<br>1. Pre-operative<br>2. 3 or 6 months<br>3. 1 year, 2 years, 5 years, 7 years, 10 years and 15 years |
| <b>VR12 Have Energy<br/>(vr12havelotofenergy)</b>                                   | 01/05/2014 – | Categorical | 1=All of the time<br>2=Most of the time<br>3=A good bit of the time<br>4=Some of the time<br>5=A little of the time                       | Mail out and follow-up phone call<br>Follow-up:<br>1. Pre-operative<br>2. 3 or 6 months                                                                |

Version 5: 09/04/2020

|                                                                               |              |             |                                                                                                                                           |                                                                                                                                                        |
|-------------------------------------------------------------------------------|--------------|-------------|-------------------------------------------------------------------------------------------------------------------------------------------|--------------------------------------------------------------------------------------------------------------------------------------------------------|
|                                                                               |              |             | 6=None of the time                                                                                                                        | 3. 1 year, 2 years, 5 years, 7 years, 10 years and 15 years                                                                                            |
| <b>VR12 Feeling Downhearted (vr12feeldown)</b>                                | 01/05/2014 – | Categorical | 1=All of the time<br>2=Most of the time<br>3=A good bit of the time<br>4=Some of the time<br>5=A little of the time<br>6=None of the time | Mail out and follow-up phone call<br>Follow-up:<br>1. Pre-operative<br>2. 3 or 6 months<br>3. 1 year, 2 years, 5 years, 7 years, 10 years and 15 years |
| <b>VR12 Interference with Social Activities (vr12socialactiv)</b>             | 01/05/2014 – | Categorical | 1=All of the time<br>2=Most of the time<br>3=Some of the time<br>4=A little of the time<br>5=None of the time                             | Mail out and follow-up phone call<br>Follow-up:<br>1. Pre-operative<br>2. 3 or 6 months<br>3. 1 year, 2 years, 5 years, 7 years, 10 years and 15 years |
| <b>Vr12 Physical Health (vr12physicalhealthnow)</b>                           | 01/05/2014 – | Categorical | 1=Much better<br>2=Slightly better<br>3=About the same<br>4=Slightly worse<br>5=Much worse                                                | Mail out and follow-up phone call<br>Follow-up:<br>1. Pre-operative<br>2. 3 or 6 months<br>3. 1 year, 2 years, 5 years, 7 years, 10 years and 15 years |
| <b>VR12 Emotional Health (vr12emotionalhealthnow)</b>                         | 01/05/2014 – | Categorical | 1=Much better<br>2=Slightly better<br>3=About the same<br>4=Slightly worse<br>5=Much worse                                                | Mail out and follow-up phone call<br>Follow-up:<br>1. Pre-operative<br>2. 3 or 6 months<br>3. 1 year, 2 years, 5 years, 7 years, 10 years and 15 years |
| <b>VR12 Physical Score (vr12physicalscore)</b>                                | 01/05/2014 – | Numeric     | Preoperative mean (SD); range<br>TKA<br>24.5 (8.2); 3.6 to 60.3<br>THA<br>23.6 (8.0); 4.5 to 62.2                                         | Mail out and follow-up phone call<br>Follow-up:<br>1. Pre-operative<br>2. 3 or 6 months<br>3. 1 year, 2 years, 5 years, 7 years, 10 years and 15 years |
| <b>VR12 Mental Score (vr12mentalscore)</b>                                    | 01/05/2014 – | Numeric     | Preoperative mean (SD); range<br>TKA<br>45.9 (15.5); 5.9 to 77.0<br>THA<br>43.7 (15.7); 6.0 to 76.4                                       | Mail out and follow-up phone call<br>Follow-up:<br>1. Pre-operative<br>2. 3 or 6 months<br>3. 1 year, 2 years, 5 years, 7 years, 10 years and 15 years |
| <b>Western Ontario and McMaster Universities Osteoarthritis Index (WOMAC)</b> |              |             |                                                                                                                                           |                                                                                                                                                        |

Version 5: 09/04/2020

|                                                                 |            |             |                                                        |                                                                                                                                                            |
|-----------------------------------------------------------------|------------|-------------|--------------------------------------------------------|------------------------------------------------------------------------------------------------------------------------------------------------------------|
| <b>WOMAC Follow-Up<br/>(womacfollowup)</b>                      | 01/01/12 – | Binary      | 1=Yes, 0=No                                            | Mail out and follow-up phone call<br>Follow-up:<br>1. Pre-operative<br>2. 3 or 6 months<br>3. 1 year, 2 years, 5 years 7 years, 10 years,15 years,20 years |
| <b>WOMAC Pain on Walking<br/>(womacpainwalking)</b>             | 01/01/12 - | Categorical | 0=None<br>1=Mil<br>2=Moderate<br>3=Severe<br>4=Extreme | Mail out and follow-up phone call<br>Follow-up:<br>1. Pre-operative<br>2. 3 or 6 months<br>3. 1 year, 2 years, 5 years 7 years, 10 years,15 years,20 years |
| <b>WOMAC Pain Up and Down Stairs<br/>(womapainupdownstairs)</b> | 01/01/12 - | Categorical | 0=None<br>1=Mil<br>2=Moderate<br>3=Severe<br>4=Extreme | Mail out and follow-up phone call<br>Follow-up:<br>1. Pre-operative<br>2. 3 or 6 months<br>3. 1 year, 2 years, 5 years 7 years, 10 years,15 years,20 years |
| <b>WOMAC Pain in Bed<br/>(womacpaininbed)</b>                   | 01/01/12 - | Categorical | 0=None<br>1=Mil<br>2=Moderate<br>3=Severe<br>4=Extreme | Mail out and follow-up phone call<br>Follow-up:<br>1. Pre-operative<br>2. 3 or 6 months<br>3. 1 year, 2 years, 5 years 7 years, 10 years,15 years,20 years |
| <b>WOMAC Pain Sitting and Lying<br/>(womacpainsittinglying)</b> | 01/01/12 - | Categorical | 0=None<br>1=Mil<br>2=Moderate<br>3=Severe<br>4=Extreme | Mail out and follow-up phone call<br>Follow-up:<br>1. Pre-operative<br>2. 3 or 6 months<br>3. 1 year, 2 years, 5 years 7 years, 10 years,15 years,20 years |
| <b>WOMAC Pain on Standing<br/>(womacpainstanding)</b>           | 01/01/12 - | Categorical | 0=None<br>1=Mil<br>2=Moderate<br>3=Severe<br>4=Extreme | Mail out and follow-up phone call<br>Follow-up:<br>1. Pre-operative<br>2. 3 or 6 months<br>3. 1 year, 2 years, 5 years 7 years, 10 years,15 years,20 years |

Version 5: 09/04/2020

|                                                                          |            |             |                                                        |                                                                                                                                                            |
|--------------------------------------------------------------------------|------------|-------------|--------------------------------------------------------|------------------------------------------------------------------------------------------------------------------------------------------------------------|
| <b>WOMAC Stiffness on Waking<br/>(womacstiffnesswakening)</b>            | 01/01/12 - | Categorical | 0=None<br>1=Mil<br>2=Moderate<br>3=Severe<br>4=Extreme | Mail out and follow-up phone call<br>Follow-up:<br>1. Pre-operative<br>2. 3 or 6 months<br>3. 1 year, 2 years, 5 years 7 years, 10 years,15 years,20 years |
| <b>WOMAC Stiffness on Sitting and Lying (womacstiffnesssittinglying)</b> | 01/01/12 - | Categorical | 0=None<br>1=Mil<br>2=Moderate<br>3=Severe<br>4=Extreme | Mail out and follow-up phone call<br>Follow-up:<br>1. Pre-operative<br>2. 3 or 6 months<br>3. 1 year, 2 years, 5 years 7 years, 10 years,15 years,20 years |
| <b>WOMAC Function Descending Stairs (womacmotdescstairs)</b>             | 01/01/12 - | Categorical | 0=None<br>1=Mil<br>2=Moderate<br>3=Severe<br>4=Extreme | Mail out and follow-up phone call<br>Follow-up:<br>1. Pre-operative<br>2. 3 or 6 months<br>3. 1 year, 2 years, 5 years 7 years, 10 years,15 years,20 years |
| <b>WOMAC Function Ascending Stairs (womacmotascstairs)</b>               | 01/01/12 - | Categorical | 0=None<br>1=Mil<br>2=Moderate<br>3=Severe<br>4=Extreme | Mail out and follow-up phone call<br>Follow-up:<br>1. Pre-operative<br>2. 3 or 6 months<br>3. 1 year, 2 years, 5 years 7 years, 10 years,15 years,20 years |
| <b>WOMAC Function Rising from Sitting (womacmotrising)</b>               | 01/01/12 - | Categorical | 0=None<br>1=Mil<br>2=Moderate<br>3=Severe<br>4=Extreme | Mail out and follow-up phone call<br>Follow-up:<br>1. Pre-operative<br>2. 3 or 6 months<br>3. 1 year, 2 years, 5 years 7 years, 10 years,15 years,20 years |
| <b>WOMAC Function Standing (womacmotstanding)</b>                        | 01/01/12 - | Categorical | 0=None<br>1=Mil<br>2=Moderate<br>3=Severe<br>4=Extreme | Mail out and follow-up phone call<br>Follow-up:<br>1. Pre-operative<br>2. 3 or 6 months<br>3. 1 year, 2 years, 5 years 7 years, 10 years,15 years,20 years |

Version 5: 09/04/2020

|                                                                              |            |             |                                                        |                                                                                                                                                            |
|------------------------------------------------------------------------------|------------|-------------|--------------------------------------------------------|------------------------------------------------------------------------------------------------------------------------------------------------------------|
| <b>WOMAC Function Bending to the Floor<br/>(womacmotbending)</b>             | 01/01/12 - | Categorical | 0=None<br>1=Mil<br>2=Moderate<br>3=Severe<br>4=Extreme | Mail out and follow-up phone call<br>Follow-up:<br>1. Pre-operative<br>2. 3 or 6 months<br>3. 1 year, 2 years, 5 years 7 years, 10 years,15 years,20 years |
| <b>WOMAC Function Walking on Flat Surfaces<br/>(womacmotwalking)</b>         | 01/01/12 - | Categorical | 0=None<br>1=Mil<br>2=Moderate<br>3=Severe<br>4=Extreme | Mail out and follow-up phone call<br>Follow-up:<br>1. Pre-operative<br>2. 3 or 6 months<br>3. 1 year, 2 years, 5 years 7 years, 10 years,15 years,20 years |
| <b>WOMAC Function Getting In and Out of Car<br/>(womacmotinoutcar)</b>       | 01/01/12 - | Categorical | 0=None<br>1=Mil<br>2=Moderate<br>3=Severe<br>4=Extreme | Mail out and follow-up phone call<br>Follow-up:<br>1. Pre-operative<br>2. 3 or 6 months<br>3. 1 year, 2 years, 5 years 7 years, 10 years,15 years,20 years |
| <b>WOMAC Function Going Shopping<br/>(womacmotshopping)</b>                  | 01/01/12 - | Categorical | 0=None<br>1=Mil<br>2=Moderate<br>3=Severe<br>4=Extreme | Mail out and follow-up phone call<br>Follow-up:<br>1. Pre-operative<br>2. 3 or 6 months<br>3. 1 year, 2 years, 5 years 7 years, 10 years,15 years,20 years |
| <b>WOMAC Function Putting On Your socks or Stockings<br/>(womacmotsocks)</b> | 01/01/12 - | Categorical | 0=None<br>1=Mil<br>2=Moderate<br>3=Severe<br>4=Extreme | Mail out and follow-up phone call<br>Follow-up:<br>1. Pre-operative<br>2. 3 or 6 months<br>3. 1 year, 2 years, 5 years 7 years, 10 years,15 years,20 years |
| <b>WOMAC Function Rising From the Bed<br/>(womacmotrisingfrombed)</b>        | 01/01/12 - | Categorical | 0=None<br>1=Mil<br>2=Moderate<br>3=Severe<br>4=Extreme | Mail out and follow-up phone call<br>Follow-up:<br>1. Pre-operative<br>2. 3 or 6 months<br>3. 1 year, 2 years, 5 years 7 years, 10 years,15 years,20 years |



Version 5: 09/04/2020

|                                                                                  |            |             |                                                        |                                                                                                                                                            |
|----------------------------------------------------------------------------------|------------|-------------|--------------------------------------------------------|------------------------------------------------------------------------------------------------------------------------------------------------------------|
| <b>WOMAC Function Taking Off Your Socks or Stockings<br/>(womacmotoffsocks)</b>  | 01/01/12 - | Categorical | 0=None<br>1=Mil<br>2=Moderate<br>3=Severe<br>4=Extreme | Mail out and follow-up phone call<br>Follow-up:<br>1. Pre-operative<br>2. 3 or 6 months<br>3. 1 year, 2 years, 5 years 7 years, 10 years,15 years,20 years |
| <b>WOMAC Function Lying in Bed<br/>(womacmotlyinginbed)</b>                      | 01/01/12 - | Categorical | 0=None<br>1=Mil<br>2=Moderate<br>3=Severe<br>4=Extreme | Mail out and follow-up phone call<br>Follow-up:<br>1. Pre-operative<br>2. 3 or 6 months<br>3. 1 year, 2 years, 5 years 7 years, 10 years,15 years,20 years |
| <b>WOMAC Function Getting In or Out of Bath<br/>(womacmotinoutbath)</b>          | 01/01/12 - | Categorical | 0=None<br>1=Mil<br>2=Moderate<br>3=Severe<br>4=Extreme | Mail out and follow-up phone call<br>Follow-up:<br>1. Pre-operative<br>2. 3 or 6 months<br>3. 1 year, 2 years, 5 years 7 years, 10 years,15 years,20 years |
| <b>WOMAC Function Sitting<br/>(womacmotsitting)</b>                              | 01/01/12 - | Categorical | 0=None<br>1=Mil<br>2=Moderate<br>3=Severe<br>4=Extreme | Mail out and follow-up phone call<br>Follow-up:<br>1. Pre-operative<br>2. 3 or 6 months<br>3. 1 year, 2 years, 5 years 7 years, 10 years,15 years,20 years |
| <b>WOMAC Function Getting On or Off the Toilet<br/>(womacmotonofftoilet)</b>     | 01/01/12 - | Categorical | 0=None<br>1=Mil<br>2=Moderate<br>3=Severe<br>4=Extreme | Mail out and follow-up phone call<br>Follow-up:<br>1. Pre-operative<br>2. 3 or 6 months<br>3. 1 year, 2 years, 5 years 7 years, 10 years,15 years,20 years |
| <b>WOMAC Function Performing Heavy Domestic Duties<br/>(womacmotheavyduties)</b> | 01/01/12 - | Categorical | 0=None<br>1=Mil<br>2=Moderate<br>3=Severe<br>4=Extreme | Mail out and follow-up phone call<br>Follow-up:<br>1. Pre-operative<br>2. 3 or 6 months<br>3. 1 year, 2 years, 5 years 7 years, 10 years,15 years,20 years |

Version 5: 09/04/2020

|                                                                       |              |             |                                                                                                      |                                                                                                                                                            |
|-----------------------------------------------------------------------|--------------|-------------|------------------------------------------------------------------------------------------------------|------------------------------------------------------------------------------------------------------------------------------------------------------------|
| WOMAC Function Performing Light Domestic Duties (womacmotlightduties) | 01/01/12 -   | Categorical | 0=None<br>1=Mil<br>2=Moderate<br>3=Severe<br>4=Extreme                                               | Mail out and follow-up phone call<br>Follow-up:<br>1. Pre-operative<br>2. 3 or 6 months<br>3. 1 year, 2 years, 5 years 7 years, 10 years,15 years,20 years |
| WOMAC Pain Score (womacpainscore)                                     | 01/01/2012 – | Numeric     | Preoperative mean (SD); range<br>TKA<br>12.4 (3.6); 0.0 to 20.0<br>THA<br>12.7 (3.8); 0.0 to 20.0    | Mail out and follow-up phone call<br>Follow-up:<br>1. Pre-operative<br>2. 3 or 6 months<br>3. 1 year, 2 years, 5 years 7 years, 10 years,15 years,20 years |
| WOMAC Motion Score (womacmotscore)                                    | 01/01/2012 – | Numeric     | Preoperative mean (SD); range<br>TKA<br>5.3 (1.7); 0.0 to 8.0<br>THA<br>5.5 (1.7); 0.0 to 8.0        | Mail out and follow-up phone call<br>Follow-up:<br>1. Pre-operative<br>2. 3 or 6 months<br>3. 1 year, 2 years, 5 years 7 years, 10 years,15 years,20 years |
| WOMAC Function Score (womacfunctionscore)                             | 01/01/2012 – | Numeric     | Preoperative mean (SD); range<br>TKA<br>42.0 (12.4); 0.0 to 68.0<br>THA<br>44.9 (12.4); 5.0 to 68.0  | Mail out and follow-up phone call<br>Follow-up:<br>1. Pre-operative<br>2. 3 or 6 months<br>3. 1 year, 2 years, 5 years 7 years, 10 years,15 years,20 years |
| WOMAC Total Score (womactotalscore)                                   | 01/01/2012 – | Numeric     | Preoperative mean (SD); range<br>TKA<br>59.6 (16.6); 2.0 to 96.0<br>THA<br>63.1 (16.7); 10.0 to 96.0 | Mail out and follow-up phone call<br>Follow-up:<br>1. Pre-operative<br>2. 3 or 6 months<br>3. 1 year, 2 years, 5 years 7 years, 10 years,15 years,20 years |

4. Secondary Data Elements

4.1 Implant and Bone Graft Details (Hip)

| Variable (code) | Collection Period | Type of Variable | Relevant definition/ mean (SD); range | Data Source(s) |
|-----------------|-------------------|------------------|---------------------------------------|----------------|
|-----------------|-------------------|------------------|---------------------------------------|----------------|

Version 5: 09/04/2020

|                                                    |  |         |                                                                                                                                                                                      |                                   |
|----------------------------------------------------|--|---------|--------------------------------------------------------------------------------------------------------------------------------------------------------------------------------------|-----------------------------------|
| Liner Size<br>(acetabulumlinersizeoutdiam)         |  | String  | Various labels depending on manufacturer's specifications                                                                                                                            | As per manufacturer implant label |
| Acetabulum Cement Brand<br>(acetabulumcementbrand) |  | String  | 1=ABSIMPLEX<br>2=BIOSEL<br>3=CMW1G<br>4=CMW1R<br>5=CMW2G<br>6=CMWE<br>7=CMWEG<br>8=PALACOS<br>9=PALACOS MV&G<br>10=PALACOS R&G<br>11=SIMPLEX<br>12=SMARTSET GHV<br>13=SMARTSET GMV E | As per manufacturer implant label |
| Cup Size<br>(acetabulumcupsize)                    |  | String  | Various labels depending on manufacturer's specifications                                                                                                                            | As per manufacturer implant label |
| Liner Angle<br>(acetabulumlinerangle)              |  | String  | 1=0 degrees<br>2=0 degrees<br>3=20 degrees<br>4=Hooded<br>5=Other                                                                                                                    | As per manufacturer implant label |
| Number of Screws Used<br>(acetabulumnbofscrews)    |  | Numeric | 0 to 11                                                                                                                                                                              | As per manufacturer implant label |
| Screws Used<br>(acetabulumscrowsused)              |  | Binary  | 0=No; 1=Yes                                                                                                                                                                          | As per manufacturer implant label |
| Femur Cement Type<br>(femuracetabulumcementtype)   |  | Binary  | 1=Plain<br>2=Antibiotic                                                                                                                                                              | As per manufacturer implant label |
| Femur Cement Brand<br>(femurcementbrand)           |  | String  | 1=ABSIMPLEX<br>2=BIOSEL<br>3=CMW1G<br>4=CMW1R<br>5=CMW2G<br>6=CMWE<br>7=CMWEG<br>8=PALACOS<br>9=PALACOS MV&G<br>10=PALACOS R&G<br>11=SIMPLEX<br>12=SMARTSET GHV                      | As per manufacturer implant label |

Version 5: 09/04/2020

|                                  |  |        |                                                           |                                   |
|----------------------------------|--|--------|-----------------------------------------------------------|-----------------------------------|
|                                  |  |        | 13=SMARTSET GMV E                                         |                                   |
| Neck Offset<br>(femurneckoffset) |  | String | Various labels depending on manufacturer's specifications | As per manufacturer implant label |
| Femur Size<br>(femursize)        |  | String | Various labels depending on manufacturer's specifications | As per manufacturer implant label |

1

2

## 4.2 Implant and Bone Graft Details (Knee)

| Variable (code)                              | Collection Period | Type of Variable | Relevant definition/<br>mean (SD); range                                                                                                                                                                                                                                | Data Source(s)                    |
|----------------------------------------------|-------------------|------------------|-------------------------------------------------------------------------------------------------------------------------------------------------------------------------------------------------------------------------------------------------------------------------|-----------------------------------|
| Femur Cement Brand<br>(femurcementbrand)     |                   | String           | 1=AB SIMPLEX<br>2=CMW1G<br>3=CMW1R<br>4=CMW2G<br>5=CMW3G<br>6=CMWE<br>7=CMWEG<br>8=DE PUY CMW 2<br>9=DURACEM<br>10=PALACOS<br>11=PALACOS MV&G<br>12=PALACOS R&G<br>13=PALAMED<br>14=REFOBACIN PLUS<br>15=SIMPLEX<br>16=SMARTSET GHV<br>17=SMARTSET GMV E<br>18=SULCEM 3 | As per manufacturer implant label |
| Insert Thickness<br>(insertthickness)        |                   | String           | Various labels depending on manufacturer's specifications                                                                                                                                                                                                               | As per manufacturer implant label |
| Patella Cement Brand<br>(patellacementbrand) |                   | String           | 1=AB SIMPLEX<br>2=CMW1G<br>3=CMW1R<br>4=CMW2G<br>5=CMW3G<br>6=CMWE<br>7=CMWEG                                                                                                                                                                                           | As per manufacturer implant label |

60

Version 5: 09/04/2020

|                                                   |  |             |                                                                                                                                                                                                                                                                         |                                   |
|---------------------------------------------------|--|-------------|-------------------------------------------------------------------------------------------------------------------------------------------------------------------------------------------------------------------------------------------------------------------------|-----------------------------------|
|                                                   |  |             | 8=DE PUY CMW 2<br>9=DURACEM<br>10=PALACOS<br>11=PALACOS MV&G<br>12=PALACOS R&G<br>13=PALAMED<br>14=REFOBACIN PLUS<br>15=SIMPLEX<br>16=SMARTSET GHV<br>17=SMARTSET GMV E<br>18=SULCEM 3                                                                                  |                                   |
| <b>Patella Material<br/>(patellamaterial)</b>     |  | Categorical | 1=PE implant<br>2=Metal backed<br>3=Other                                                                                                                                                                                                                               | As per manufacturer implant label |
| <b>Patella Size<br/>(patellasize)</b>             |  | String      | Various labels depending on<br>manufacturer's specifications                                                                                                                                                                                                            | As per manufacturer implant label |
| <b>Patella Type<br/>(patellatype)</b>             |  | Categorical | 1=Inset<br>2=Onlay Symmetric<br>3=Mobile<br>4=Onlay Asymmetric                                                                                                                                                                                                          | As per manufacturer implant label |
| <b>Tibial Cement Brand<br/>(tibiacementbrand)</b> |  | String      | 1=AB SIMPLEX<br>2=CMW1G<br>3=CMW1R<br>4=CMW2G<br>5=CMW3G<br>6=CMWE<br>7=CMWEG<br>8=DE PUY CMW 2<br>9=DURACEM<br>10=PALACOS<br>11=PALACOS MV&G<br>12=PALACOS R&G<br>13=PALAMED<br>14=REFOBACIN PLUS<br>15=SIMPLEX<br>16=SMARTSET GHV<br>17=SMARTSET GMV E<br>18=SULCEM 3 | As per manufacturer implant label |
| <b>Tibial Size<br/>(tibialsize)</b>               |  | String      | Various labels depending on<br>manufacturer's specifications                                                                                                                                                                                                            | As per manufacturer implant label |

Version 5: 09/04/2020

|                                    |  |         |                                                           |                                   |
|------------------------------------|--|---------|-----------------------------------------------------------|-----------------------------------|
| Number of Screws (tibianbofscrews) |  | Numeric | Intraoperative Range<br>0 to 10                           | As per manufacturer implant label |
| Screws Used (tibiасrewsused)       |  | Binary  | 0=No; 1=Yes                                               | As per manufacturer implant label |
| Femur Size (femoralsize)           |  | String  | Various labels depending on manufacturer’s specifications | As per manufacturer implant label |

- 1
- 2
- 3
- 4.3 Patient-Reported Outcome Measures
- The patient satisfaction score included in the following table was included with Socrates. Details are available on the [Socrates website](#).

| Variable (code)                                                                               | Collection Period | Type of Variable | Relevant definition/ mean (SD); range                                    | Data Source(s) |
|-----------------------------------------------------------------------------------------------|-------------------|------------------|--------------------------------------------------------------------------|----------------|
| Patient Satisfaction - Follow-Up (patsatfollowup)                                             |                   | Binary           | 0=No; 1=Yes                                                              |                |
| Patient Satisfaction – Relieve pain (patsatpain)                                              |                   | Categorical      | 1=Excellent<br>2=Very good<br>3=Good<br>4=Fair<br>5=Poor                 |                |
| Patient Satisfaction – Increase activities (patsatactivities)                                 |                   | Categorical      | 1=Excellent<br>2=Very good<br>3=Good<br>4=Fair<br>5=Poor                 |                |
| Patient Satisfaction – Perform heavy work or sport (patsatwork)                               |                   | Categorical      | 1=Excellent<br>2=Very good<br>3=Good<br>4=Fair<br>5=Poor                 |                |
| Patient Satisfaction – Meet expectations (patsatexpectations)                                 |                   | Categorical      | 1=Excellent<br>2=Very good<br>3=Good<br>4=Fair<br>5=Poor                 |                |
| Patient Satisfaction – Willingness to have the operation again on another joint (patsatagain) |                   | Categorical      | 1=Definitely yes<br>2=Probably yes<br>3=Possibly not<br>4=Definitely not |                |

Version 5: 09/04/2020

## 1 4.4 Hospital Cost Data

| Variable (code)                           | Collection Period                                        | Type of Variable | Relevant definition/<br>mean (SD); range                                                                                                                                                                                                                                                                                                 | Data Source(s)                 |
|-------------------------------------------|----------------------------------------------------------|------------------|------------------------------------------------------------------------------------------------------------------------------------------------------------------------------------------------------------------------------------------------------------------------------------------------------------------------------------------|--------------------------------|
| Hospital Cost Data - Available (costdata) |                                                          | Binary           | 0=No; 1=Yes                                                                                                                                                                                                                                                                                                                              | Hospital Decision Support Unit |
| Knee                                      |                                                          |                  |                                                                                                                                                                                                                                                                                                                                          |                                |
| Total Direct Hospital Costs (totalcost)   | 01/01/2006 to 31/12/2007<br><br>01/01/2012 to 31/12/2016 | Numeric          | Preoperative mean \$ (SD); range<br>2006: 16,226 (8,643); 7,951 to 86,269<br>2007: 19,840 (10,233); 9,991 to 109,863<br><br>2012: 18,152 (4,633); 8,264 to 55,614<br>2013: 19,607 (6,631); 6,531 to 94,363<br>2014: 19,636 (3,936); 11,689 to 51,137<br>2015: 19,277 (3,796); 10,348 to 43,266<br>2016: 19,616 (10,705) 9,039 to 180,810 | Hospital Decision Support Unit |
| Allied Health (alliedhealthtotal)         | 01/01/2006 to 31/12/2007<br><br>01/01/2012 to 31/12/2016 | Numeric          | Preoperative mean \$ (SD); range<br>2006: 578 (364); 132 to 3,796<br>2007: 741 (463); 18 to 4,189<br>2012: 843 (386); 82 to 2,761<br><br>2013: 902 (432); 0 to 3,714<br>2014: 821 (398); 34 to 3,238<br>2015: 923 (447); 199 to 2,564<br>2016: 935 (687); 79 to 9,785                                                                    | Hospital Decision Support Unit |
| Imaging (imagingtotal)                    | 01/01/2006 to 31/12/2007<br><br>01/01/2012 to 31/12/2016 | Numeric          | Preoperative mean \$ (SD); range<br>2006: 177 (254); 60 to 2,241<br>2007: 168 (276); 0 to 2,019<br><br>2012: 174 (263); 0 to 1,805<br>2013: 162 (242); 0 to 1,652<br>2014: 191 (363); 66 to 3,108<br>2015: 164 (247); 66 to 1,703<br>2016: 195 (474) (52 to 5,702                                                                        | Hospital Decision Support Unit |
| Surgical Care (medicalsurgtotal)          | 01/01/2006 to 31/12/2007                                 | Numeric          | Preoperative mean \$ (SD); range<br>2006: 1,168 (788); 553 to 7,158<br>2007: 1,288 (797); 521 to 7,947<br>2011:                                                                                                                                                                                                                          | Hospital Decision Support Unit |

Version 5: 09/04/2020

|                                               |                                                          |         |                                                                                                                                                                                                                                                                                                                                |                                |
|-----------------------------------------------|----------------------------------------------------------|---------|--------------------------------------------------------------------------------------------------------------------------------------------------------------------------------------------------------------------------------------------------------------------------------------------------------------------------------|--------------------------------|
|                                               | 01/01/2012 to 31/12/2016                                 |         | 2012: 1,235 (425); 346 to 2,852<br>2013: 1,137 (415); 276 to 3,614<br>2014: 1,098 (375); 216 to 3,043<br>2015: 1,272 (493); 305 to 4,305<br>2016: 1,522 (924); 346 to 13,984                                                                                                                                                   |                                |
| <b>Medical Care<br/>(medicalnonsurgtotal)</b> | 01/01/2006 to 31/12/2007<br><br>01/01/2012 to 31/12/2016 | Numeric | Preoperative mean \$ (SD); range<br><br>2006: 161 (101); 46 to 780<br>2007: 139 (111); 38 to 897<br><br>2012: 1,293 (604); 357 to 5,590<br>2013: 1,390 (990); 189 to 12,685<br>2014: 1,337 (572); 443 to 5,623<br>2015: 1,277 (512); 389 to 4,196<br>2016: 1,198 (947); 327 to 15,595                                          | Hospital Decision Support Unit |
| <b>Nursing Care<br/>(nursingtotal)</b>        | 01/01/2006 to 31/12/2007<br><br>01/01/2012 to 31/12/2016 | Numeric | Preoperative mean \$ (SD); range<br><br>2006: 5,927 (4,302); 2,096 to 39,713<br>2007: 7,398 (5,418); 1,336 to 60,020<br><br>2012: 3,214 (1,348); 1,040 to 12,900<br>2013: 3,494 (2,109); 681 to 27,153<br>2014: 3,868 (1,360); 1,782 to 12,089<br>2015: 4,075 (1,560); 1,655 to 17,294<br>2016: 4,451 (3,561); 1,700 to 60,900 | Hospital Decision Support Unit |
| <b>Pathology<br/>(pathologytotal)</b>         | 01/01/2006 to 31/12/2007<br><br>01/01/2012 to 31/12/2016 | Numeric | Preoperative mean \$ (SD); range<br><br>2006: 115 (180); 11 to 1,993<br>2007: 106 (128); 3 to 1,072<br><br>2012: 266 (300); 53 to 1,852<br>2013: 270 (318); 0 to 2,322<br>2014: 254 (268); 14 to 2,160<br>2015: 249 (297); 61 to 3,269<br>2016: 267 (545); 36 to 7,816                                                         | Hospital Decision Support Unit |
| <b>Pharmacy<br/>(pharmacytotal)</b>           | 01/01/2006 to 31/12/2007<br><br>01/01/2012 to 31/12/2016 | Numeric | Preoperative mean \$ (SD); range<br><br>2006: 523 (408); 211 to 4,276<br>2007: 538 (827); 163 to 11,563<br><br>2012: 463 (649); 154 to 11,931<br>2013: 532 (2,125); 125 to 37,541<br>2014: 355 (188); 147 to 2,577<br>2015: 293 (128); 76 to 1,098<br>2016: 381 (1,307); 102 to 23,677                                         | Hospital Decision Support Unit |



Version 5: 09/04/2020

|                                                    |                                                                |         |                                                                                                                                                                                                                                                                                                                                                |                                |
|----------------------------------------------------|----------------------------------------------------------------|---------|------------------------------------------------------------------------------------------------------------------------------------------------------------------------------------------------------------------------------------------------------------------------------------------------------------------------------------------------|--------------------------------|
| <b>Theatre<br/>(theatretotal)</b>                  | 01/01/2006 to<br>31/12/2007<br><br>01/01/2012 to<br>31/12/2016 | Numeric | Preoperative mean \$ (SD); range<br>2006: 6,192 (2,139); 2,967 to 19,308<br>2007: 7,380 (2,835); 4,448 to 33,832<br><br>2012: 10,616 (2,940) 3,174 to 25,429<br>2013: 11,595 (2,719); 1,553 to 29,845<br>2014: 11,600 (2,159); 6,231 to 23,556<br>2015: 10,920 (1,857); 4,240 to 18,146<br>2016: 10,431 (2,564); 4,403 to 28,345               | Hospital Decision Support Unit |
| <b>Prosthesis<br/>(prosthesis)</b>                 | 01/01/2006 to<br>31/12/2007<br><br>01/01/2012 to<br>31/12/2016 | Numeric | Preoperative mean \$ (SD); range<br>2006: 3,739 (1,773); 880 to 12,511<br>2007: 4,053 (1,600); 2,490 to 12,155<br><br>2012: 6,598 (2,752); 179 to 21,401<br>2013: 7,572 (2,484); 0 to 25,973<br>2014: 7,663 (1,903); 3,102 to 16,219<br>2015: 7,017 (1,511); 2,778 to 13,312<br>2016: 6,066 (1,615); 1,121 to 14,383                           | Hospital Decision Support Unit |
| <b>Hip</b>                                         |                                                                |         |                                                                                                                                                                                                                                                                                                                                                |                                |
| <b>Total Direct Hospital Costs<br/>(totalcost)</b> | 01/01/2006 to<br>31/12/2007<br><br>01/01/2012 to<br>31/12/2016 | Numeric | Preoperative mean \$ (SD); range<br>2006: 20,846 (17,340); 9,699 to 159,373<br>2007: 20,437 (12,268); 10,252 to 128,102<br><br>2012: 18,154 (5,019); 7,613 to 56,977<br>2013: 18,630 (5,905); 11,393 to 60,929<br>2014: 19,137 (5,165); 11,461 to 58,653<br>2015: 20,569 (15,741); 12,892 to 267,874<br>2016: 18,661 (4,746); 11,157 to 65,474 | Hospital Decision Support Unit |
| <b>Allied Health<br/>(alliedhealthtotal)</b>       | 01/01/2006 to<br>31/12/2007<br><br>01/01/2012 to<br>31/12/2016 | Numeric | Preoperative mean \$ (SD); range<br>2006: 797 (866); 141 to 8,724<br>2007: 886 (1,009); 199 to 12,297<br><br>2012: 820 (431); 92 to 3,617<br>2013: 943 (618); 134 to 4,888<br>2014: 875 (523); 17 to 3,581<br>2015: 941 (1,117); 0 to 18,719<br>2016: 845 (617); 0 to 7,609                                                                    | Hospital Decision Support Unit |
| <b>Imaging<br/>(imagingtotal)</b>                  |                                                                | Numeric | Preoperative mean \$ (SD); range                                                                                                                                                                                                                                                                                                               | Hospital Decision Support Unit |

Version 5: 09/04/2020

|                                               |                                                      |         |                                                                                                                                                                                                                                                                                                                           |                                |
|-----------------------------------------------|------------------------------------------------------|---------|---------------------------------------------------------------------------------------------------------------------------------------------------------------------------------------------------------------------------------------------------------------------------------------------------------------------------|--------------------------------|
|                                               | 01/01/2006 to 31/12/2007<br>01/01/2012 to 31/12/2016 |         | 2006: 284 (902); 65 to 10,629<br>2007: 199 (429); 0 to 4,727<br><br>2012: 211 (320); 0 to 2,076<br>2013: 296 (693); 71 to 6,791<br>2014: 237 (438); 0 to 4,796<br>2015: 255 (628); 0 to 9,030<br>2016: 254 (595); 57 to 7,888                                                                                             |                                |
| <b>Surgical Care<br/>(medicalsurgtotal)</b>   | 01/01/2006 to 31/12/2007<br>01/01/2012 to 31/12/2016 | Numeric | Preoperative mean \$ (SD); range<br>2006: 1,438 (1,636); 19 to 16,229<br>2007: 1,278 (823); 483 to 7,609<br><br>2012: 1,281 (637); 201 to 9,441<br>2013: 1,171 (496); 251 to 3,381<br>2014: 1,168 (497); 305 to 3,675<br>2015: 1,414 (762); 371 to 11,033<br>2016: 1,420 (537); 234 to 4,236                              | Hospital Decision Support Unit |
| <b>Medical Care<br/>(medicalnonsurgtotal)</b> | 01/01/2006 to 31/12/2007<br>01/01/2012 to 31/12/2016 | Numeric | Preoperative mean \$ (SD); range<br>2006: 218 (298); 40 to 3,018<br>2007: 157 (242); 37 to 2,581<br><br>2012: 1,240 (802); 382 to 9,276<br>2013: 1,362 (845); 563 to 7,578<br>2014: 1,357 (757); 445 to 7,538<br>2015: 1,418 (2,309); 163 to 36,609<br>2016: 1,053 (607); 308 to 9,083                                    | Hospital Decision Support Unit |
| <b>Nursing Care<br/>(nursingtotal)</b>        | 01/01/2006 to 31/12/2007<br>01/01/2012 to 31/12/2016 | Numeric | Preoperative mean \$ (SD); range<br>2006: 9,326 (9,110); 1,959 to 88,696<br>2007: 8,653 (6,566); 2,017 to 62,517<br><br>2012: 3,143 (1,916); 994 to 21,817<br>2013: 3,531 (2,151); 1,398 to 18,347<br>2014: 3,931 (1,990); 1,549 to 21,978<br>2015: 4,547 (7,917); 553 to 132,237<br>2016: 3,954 (1,817); 1,000 to 20,100 | Hospital Decision Support Unit |
| <b>Pathology<br/>(pathologytotal)</b>         | 01/01/2006 to 31/12/2007<br>01/01/2012 to 31/12/2016 | Numeric | Preoperative mean \$ (SD); range<br>2006: 241 (649); 6 to 6,818<br>2007: 162 (349); 6 to 4,278<br><br>2012: 374 (520); 0 to 5,006<br>2013: 412 (557); 0 to 4,743                                                                                                                                                          | Hospital Decision Support Unit |

Version 5: 09/04/2020

|                                     |                                                                |         |                                                                                                                                                                                                                                                                                                                                    |                                |
|-------------------------------------|----------------------------------------------------------------|---------|------------------------------------------------------------------------------------------------------------------------------------------------------------------------------------------------------------------------------------------------------------------------------------------------------------------------------------|--------------------------------|
|                                     |                                                                |         | 2014: 354 (386); 14 to 3,387<br>2015: 369 (721); 0 to 11,308<br>2016: 317 (355); 14 to 2,178                                                                                                                                                                                                                                       |                                |
| <b>Pharmacy<br/>(pharmacytotal)</b> | 01/01/2006 to<br>31/12/2007<br><br>01/01/2012 to<br>31/12/2016 | Numeric | Preoperative mean \$ (SD); range<br><br>2006: 562 (1,370); 42 to 12,129<br>2007: 424 (1,225); 115 to 16,223<br><br>2012: 437 (296); 177 to 4,029<br>2013: 405 (289); 147 to 3,059<br>2014: 370 (273); 147 to 3,743<br>2015: 363 (658); 87 to 9,758<br>2016: 280 (153); 95 to 1,771                                                 | Hospital Decision Support Unit |
| <b>Theatre<br/>(theatretotal)</b>   | 01/01/2006 to<br>31/12/2007<br><br>01/01/2012 to<br>31/12/2016 | Numeric | Preoperative mean \$ (SD); range<br><br>2006: 6,948 (2,564); 767 to 27,507<br>2007: 7,624 (2,539); 2,284 to 28,719<br><br>2012: 10,446 (2,582); 2,064 to 28,993<br>2013: 10,279 (2,671); 4,664 to 39,240<br>2014: 10,614 (2,040) 5,903 to 27,389<br>2015: 11,066 (3,210); 6,241 to 46,138<br>2016: 10,361 (1,995); 5,991 to 30,816 | Hospital Decision Support Unit |
| <b>Prosthesis<br/>(prosthesis)</b>  | 01/01/2006 to<br>31/12/2007<br><br>01/01/2012 to<br>31/12/2016 | Numeric | Preoperative mean \$ (SD); range<br><br>2006: 4,227 (1,384); 0 to 14,217<br>2007: 4,235 (1,074); 0 to 9,558<br><br>2012: 6,677 (2,041); 23 to 18,876<br>2013: 6,430 (2,274); 0 to 32,506<br>2014: 6,746 (1,546); 3,379 to 20,042<br>2015: 6,990 (2,226); 3,404 to 34,669<br>2016: 6,379 (1,520); 2,400 to 25,793                   | Hospital Decision Support Unit |

Version 5: 09/04/2020

## 5. References

1. Kellgren J, Lawrence J. Radiological assessment of osteo-arthritis. *Ann Rheum Dis* 1957; **16**(4): 494.
2. Dowsey MM, Nikpour M, Dieppe P, Choong PF. Associations between pre-operative radiographic osteoarthritis severity and pain and function after total hip replacement : Radiographic OA severity predicts function after THR. *Clin Rheumatol* 2016; **35**(1): 183-9.
3. Dowsey MM, Nikpour M, Dieppe P, Choong PF. Associations between pre-operative radiographic changes and outcomes after total knee joint replacement for osteoarthritis. *Osteoarthritis Cartilage* 2012; **20**(10): 1095-102.
4. Adhikari P. Socio-economic indexes for areas: introduction, use and future directions. *Canberra: Australian Bureau of Statistics* 2006: 1-37.
5. Statistics ABo. ASGC remoteness classification: purpose and use. *Census Paper No: 03/01* 2003.
6. McGrail MR, Humphreys JS. Geographical classifications to guide rural health policy in Australia. *Australia and New Zealand Health Policy* 2009; **6**(1): 28.
7. Welfare AIOHa. Dwelling - geographic remoteness, classification (ASGC-RA) N. 10/05/2019 10/05/2019. <https://meteor.aihw.gov.au/content/index.phtml/itemId/711262/meteorItemView/long> (accessed 07/04/2020 2020).
8. Statistics ABo. 2033.0.55.001 - Census of Population and Housing: Socio-Economic Indexes for Areas (SEIFA), Australia, 2011. 23/03/2018 2011. <https://www.abs.gov.au/AUSSTATS/abs@.nsf/allprimarymainfeatures/8C5F5BB699A0921CCA258259000BA619?opendocument> (accessed 07/04/2020 2020).
9. Hall WH, Ramachandran R, Narayan S, Jani AB, Vijayakumar S. An electronic application for rapidly calculating Charlson comorbidity score. *BMC cancer* 2004; **4**: 94-.
10. Bjorgul K, Novicoff WM, Saleh KJ. Evaluating comorbidities in total hip and knee arthroplasty: available instruments. *Journal of Orthopaedics and Traumatology* 2010; **11**(4): 203-9.
11. Daabiss M. American Society of Anaesthesiologists physical status classification. *Indian journal of anaesthesia* 2011; **55**(2): 111.
12. Wolters U, Wolf T, Stützer H, Schröder T. ASA classification and perioperative variables as predictors of postoperative outcome. *British journal of anaesthesia* 1996; **77**(2): 217-22.
13. Owens WD, Felts JA, Spitznagel EL, Jr. ASA physical status classifications: a study of consistency of ratings. *Anesthesiology* 1978; **49**(4): 239-43.
14. Bellamy N, Buchanan WW, Goldsmith CH, Campbell J, Stitt LW. Validation study of WOMAC: a health status instrument for measuring clinically important patient relevant outcomes to antirheumatic drug therapy in patients with osteoarthritis of the hip or knee. *J Rheumatol* 1988; **15**(12): 1833-40.
15. Bourne RB, Chesworth BM, Davis AM, Mahomed NN, Charron KDJ. Patient satisfaction after total knee arthroplasty: who is satisfied and who is not? *Clinical orthopaedics and related research* 2010; **468**(1): 57-63.
16. Ko Y, Lo NN, Yeo SJ, et al. Comparison of the responsiveness of the SF-36, the Oxford Knee Score, and the Knee Society Clinical Rating System in patients undergoing total knee replacement. *Quality of life research : an international journal of quality of life aspects of treatment, care and rehabilitation* 2013; **22**(9): 2455-9.
17. Bachmeier CJ, March LM, Cross MJ, et al. A comparison of outcomes in osteoarthritis patients undergoing total hip and knee replacement surgery. *Osteoarthritis Cartilage* 2001; **9**(2): 137-46.
18. Quintana JM, Escobar A, Bilbao A, Arostegui I, Lafuente I, Vidaurreta I. Responsiveness and clinically important differences for the WOMAC and SF-36 after hip joint replacement. *Osteoarthritis Cartilage* 2005; **13**(12): 1076-83.
19. McConnell S, Kolopack P, Davis AM. The Western Ontario and McMaster Universities Osteoarthritis Index (WOMAC): a review of its utility and measurement properties. *Arthritis and rheumatism* 2001; **45**(5): 453-61.
20. Kazis LE, Miller DR, Skinner KM, et al. Applications of methodologies of the Veterans Health Study in the VA healthcare system: conclusions and summary. *J Ambul Care Manage* 2006; **29**(2): 182-8.
21. Ware J, Jr., Kosinski M, Keller SD. A 12-Item Short-Form Health Survey: construction of scales and preliminary tests of reliability and validity. *Medical care* 1996; **34**(3): 220-33.
22. Noble PC, Scuderi GR, Brekke AC, et al. Development of a new Knee Society scoring system. *Clinical orthopaedics and related research* 2012; **470**(1): 20-32.
23. Ramkumar PN, Harris JD, Noble PC. Patient-reported outcome measures after total knee arthroplasty: a systematic review. *Bone & joint research* 2015; **4**(7): 120-7.

Version 5: 09/04/2020

24. Nilsdotter A, Bremander A. Measures of hip function and symptoms: Harris Hip Score (HHS), Hip Disability and Osteoarthritis Outcome Score (HOOS), Oxford Hip Score (OHS), Lequesne Index of Severity for Osteoarthritis of the Hip (LISOH), and American Academy of Orthopedic Surgeons (AAOS) Hip and Knee Questionnaire. *Arthritis Care Res (Hoboken)* 2011; **63**(S11): S200-S7.
