# Supplementary material
Source: HighWire-hosted journal article supplement (https://bmjopen.bmj.com/content/11/1/e040408)
Supplement: inline-supplementary-material-3 [file inline-supplementary-material-3.pdf]

## SOCRATES HIP CRF

| PATIENT DEMOGRAPHICS       |  |
|----------------------------|--|
| Patient                    |  |
| Name                       |  |
| Gender                     |  |
| DOB                        |  |
| UR                         |  |
| Marital Status             |  |
| Title                      |  |
| Address                    |  |
| Postcode                   |  |
| Patient Keywords           |  |
| Birth Country              |  |
| Language                   |  |
| Side                       |  |
| Protocol                   |  |
| HIP ARTHROPLASTY HISTORY   |  |
| General                    |  |
| Surgeon                    |  |
| Hospital/Clinic            |  |
| Assistant                  |  |
| Referring Doctor           |  |
| Study ID                   |  |
| Surgery Keywords           |  |
| After Surgery              |  |
| Admit Date                 |  |
| Discharge Date             |  |
| Discharged To              |  |
| Procedure Details          |  |
| Date of Surgery            |  |
| Type of Surgery            |  |
| Patient Info               |  |
| Weight                     |  |
| Height                     |  |
| Surgery Status             |  |
| Surgery Status             |  |
| SURGICAL PROCEDURE DETAILS |  |
| Surgical Details           |  |
| Operator                   |  |
| Anaesthetic                |  |
| Regional Block             |  |
| OR Time Knife to Skin      |  |

## SOCRATES HIP CRF

|                                           |
|-------------------------------------------|
| <b>Anaesthetic Rating</b>                 |
| <b>Pathology</b>                          |
| <b>Cause of Arthritis</b>                 |
| <b>Procedure</b>                          |
| <b>Approach</b>                           |
| <b>Navigation Used</b>                    |
| <b>Bilateral</b>                          |
| <b>Drains</b>                             |
| <b>Unit Red Blood Cells</b>               |
| <b>Implant and Bone Graft Details</b>     |
| <b>Femur Brand</b>                        |
| <b>Femur Size</b>                         |
| <b>Neck Offset</b>                        |
| <b>Femur Fixation</b>                     |
| <b>Cement Brand</b>                       |
| <b>Cement Type</b>                        |
| <b>Head Diameter/Size</b>                 |
| <b>Acetabular Brand</b>                   |
| <b>Cup Size</b>                           |
| <b>Liner Angle</b>                        |
| <b>Liner Size</b>                         |
| <b>Cup Fixation</b>                       |
| <b>Screws Used</b>                        |
| <b>Cement Brand</b>                       |
| <b>Cement Type</b>                        |
| <b>Articulating Surface</b>               |
| <b>Surgery Custom Fields</b>              |
| <b>Mini Incision (Alphanumeric Field)</b> |
| <b>Drain Loss (Numeric Field)</b>         |
| <b>Post-op/Rehab</b>                      |
| <b>DVT Prophylaxis</b>                    |
| <b>Anticoagulation</b>                    |
| <b>Post-op Analgesia</b>                  |
| <b>CUSTOM FIELDS</b>                      |
| <b>Alphanumeric/Categorical Fields</b>    |
| <b>ASGC RA's</b>                          |
| <b>Interpreter</b>                        |
| <b>K_L Score</b>                          |
| <b>Cementation</b>                        |
| <b>SEIFA</b>                              |
| <b>Anticoagulant</b>                      |

## SOCRATES HIP CRF

| <b>Numeric Fields</b>                        |
|----------------------------------------------|
| <b>Contralateral Hip OA</b>                  |
| <b>Knee OA Right</b>                         |
| <b>Knee OA Left</b>                          |
| <b>GOR</b>                                   |
| <b>Case Number</b>                           |
| <b>EXAM, FOLLOW-UP, COMPLICATIONS</b>        |
| <b>History &amp; Comorbidities</b>           |
| <b>Comorbidites</b>                          |
| <b>Charlson Comorbidities</b>                |
| <b>Examination &amp; Symptoms</b>            |
| <b>Charnley</b>                              |
| <b>Pre-op Hb</b>                             |
| <b>Post-op Hb</b>                            |
| <b>Complications &amp; Outcomes</b>          |
| <b>Complication</b>                          |
| <b>Evaluation Date</b>                       |
| <b>Occurrence</b>                            |
| <b>Complication Details</b>                  |
| <b>Modified Clavien-Dindo Classification</b> |
| <b>Reoperation</b>                           |
| <b>Readmission</b>                           |
| <b>Revision</b>                              |
| <b>Additional Procedures</b>                 |
| <b>Entered on Scrates</b>                    |
