# Supplementary material
Source: HighWire-hosted journal article supplement (https://bmjopen.bmj.com/content/11/1/e040408)
Supplement: inline-supplementary-material-4 [file inline-supplementary-material-4.pdf]

## SOCRATES KNEE CRF

| PATIENT DEMOGRAPHICS       |  |
|----------------------------|--|
| Patient                    |  |
| Name                       |  |
| Gender                     |  |
| DOB                        |  |
| UR                         |  |
| Marital Status             |  |
| Title                      |  |
| Address                    |  |
| Postcode                   |  |
| Patient Keywords           |  |
| Birth Country              |  |
| Language                   |  |
| Side                       |  |
| Protocol                   |  |
| KNEE ARTHROPLASTY HISTORY  |  |
| General                    |  |
| Surgeon                    |  |
| Hospital/Clinic            |  |
| Assistant                  |  |
| Referring Doctor           |  |
| Study ID                   |  |
| Surgery Keywords           |  |
| After Surgery              |  |
| Admit Date                 |  |
| Discharge Date             |  |
| Discharged To              |  |
| Procedure Details          |  |
| Date of Surgery            |  |
| Type of Surgery            |  |
| Patient Info               |  |
| Weight                     |  |
| Height                     |  |
| Surgery Status             |  |
| Surgery Status             |  |
| SURGICAL PROCEDURE DETAILS |  |
| Surgical Details           |  |
| Operator                   |  |
| Anaesthetic                |  |
| Regional Block             |  |
| OR Time Knife to Skin      |  |

## SOCRATES KNEE CRF

|                                           |
|-------------------------------------------|
| <b>Anaesthetic Rating</b>                 |
| <b>Pathology</b>                          |
| <b>Cause of Arthritis</b>                 |
| <b>Affected Region/Condyle</b>            |
| <b>Pre-op Alignment</b>                   |
| <b>Approach</b>                           |
| <b>Alignment Referencing</b>              |
| <b>Procedure</b>                          |
| <b>Bilateral</b>                          |
| <b>Drains</b>                             |
| <b>Unit Red Blood Cells</b>               |
| <b>Implant and Bone Graft Details</b>     |
| <b>Femur Brand</b>                        |
| <b>Femur Size</b>                         |
| <b>Femur Fixation</b>                     |
| <b>Cement Type</b>                        |
| <b>Cement Brand</b>                       |
| <b>Patella Innervation</b>                |
| <b>Patella Type</b>                       |
| <b>Material</b>                           |
| <b>Patella Fixation</b>                   |
| <b>Patella Brand</b>                      |
| <b>Patella Size</b>                       |
| <b>Cement Type</b>                        |
| <b>Cement Brand</b>                       |
| <b>Tibia Brand</b>                        |
| <b>Tibia Size</b>                         |
| <b>Tibia Fixation</b>                     |
| <b>Cement Type</b>                        |
| <b>Cement Brand</b>                       |
| <b>Screws used/Number</b>                 |
| <b>Insert Thickness</b>                   |
| <b>Bearing Type</b>                       |
| <b>Constraint</b>                         |
| <b>Surgery Custom Fields</b>              |
| <b>Mini Incision (Alphanumeric Field)</b> |
| <b>Drain Loss (Numeric Field)</b>         |
| <b>Post-op/Rehab</b>                      |
| <b>DVT Prophylaxis</b>                    |
| <b>Anticoagulation</b>                    |
| <b>Post-op Analgesia</b>                  |

## SOCRATES KNEE CRF

| CUSTOM FIELDS                         |
|---------------------------------------|
| Alphanumeric/Categorical Fields       |
| ASGC RA's                             |
| Interpreter                           |
| K_L Score                             |
| SEIFA                                 |
| Anticoagulant                         |
| Numeric Fields                        |
| Contralateral Knee OA                 |
| Hip OA Right                          |
| Hip OA Left                           |
| GOR                                   |
| Case Number                           |
| EXAM, FOLLOW-UP, COMPLICATIONS        |
| History & Comorbidities               |
| Comorbidites                          |
| Charlson Comorbidities                |
| Examination & Symptoms                |
| Charnley                              |
| Hyperextension                        |
| Mecahnical Axis                       |
| Pre-op Hb                             |
| Post-op Hb                            |
| Complications & Outcomes              |
| Complication                          |
| Evalution Date                        |
| Occurrence                            |
| Complication Details                  |
| Modified Clavien-Dindo Classification |
| Reoperation                           |
| Readmission                           |
| Revision                              |
| Additional Procedures                 |
| Entered on Scorates                   |
| KSS                                   |
| Range of Motion                       |
| Extension Lag                         |
| Flexion Contracture                   |
| ML Stability                          |
| AP Stability                          |
| Alignment                             |
