# Supplementary material
Source: HighWire-hosted journal article supplement (https://bmjopen.bmj.com/content/11/1/e040408)
Supplement: inline-supplementary-material-6 [file inline-supplementary-material-6.pdf]

| <b>Publications from SMART Registry Data</b>                                                                                                                                                                 |
|--------------------------------------------------------------------------------------------------------------------------------------------------------------------------------------------------------------|
| Choong et al. 2007 - Risk factors associated with acute hip prosthetic joint infections and outcome of treatment with a rifampin-based regimen. (1)                                                          |
| Dowsey et al. 2008 - Obesity is a major risk factor for prosthetic infection after primary hip arthroplasty. (2)                                                                                             |
| Dowsey et al. 2009 - Obese diabetic patients are at substantial risk for deep infection after primary TKA. (3)                                                                                               |
| Dowsey et al. 2009 - Outcomes of total knee arthroplasty in English-versus non-English-speaking patients. (4)                                                                                                |
| Swan et al. 2011 - Significance of sentinel infective events in haematogenous prosthetic knee infections. (5)                                                                                                |
| Peel et al. 2011 - Risk factors for prosthetic hip and knee infections according to arthroplasty site. (6)                                                                                                   |
| Aboltins et al. 2011 - Gram-negative prosthetic joint infection treated with debridement, prosthesis retention and antibiotic regimens including a fluoroquinolone. (7)                                      |
| Babazadeh et al. 2012 - The accuracy of retrospectively measured range of motion in knee arthroplasty. (8)                                                                                                   |
| Dowsey et al. 2012 - Associations between pre-operative radiographic changes and outcomes after total knee joint replacement for osteoarthritis. (9)                                                         |
| Peel et al. 2013 - Outcome of debridement and retention in prosthetic joint infections by methicillin-resistant staphylococci, with special reference to rifampin and fusidic acid combination therapy. (10) |
| Aboltins et al. 2013 - Early prosthetic hip joint infection treated with debridement, prosthesis retention and biofilm-active antibiotics: functional outcomes, quality of life and complications. (11)      |
| Babazadeh et al. 2013 - The long leg radiograph is a reliable method of assessing alignment when compared to computer-assisted navigation and computer tomography. (12)                                      |
| Carroll et al. 2014 - Risk factors for superficial wound complications in hip and knee arthroplasty. (13)                                                                                                    |
| Petterwood et al. 2014 - The immediate post-operative radiograph is an unreliable measure of coronal plane alignment in total knee replacement. (14)                                                         |
| Dowsey et al. 2016 - Development of a prognostic nomogram for predicting the probability of nonresponse to total knee arthroplasty 1 year after surgery. (15)                                                |
| Anderson et al. 2016 - Effect of re-transfusion systems on physiotherapy participation and transfusion in total knee joint arthroplasty. (16)                                                                |
| Dowsey et al. 2016 - Associations between pre-operative radiographic osteoarthritis severity and pain and function after total hip replacement: Radiographic OA severity predicts function after THR. (17)   |
| Aboltins et al. 2016 - Good quality of life outcomes after treatment of prosthetic joint infection with debridement and prosthesis retention. (18)                                                           |
| Singh et al. 2017 - Patient Endorsement of the Outcome Measures in Rheumatology (OMERACT) Total Joint Replacement (TJR) clinical trial draft core domain set. (19)                                           |
| Scarlato et al. 2017 - What is the role of catheter antibiotic prophylaxis for patients undergoing joint arthroplasty? (20)                                                                                  |
| Dowsey et al. 2010 - The impact of pre-operative obesity on weight change and outcome in total knee replacement: a prospective study of 529 consecutive patients. (21)                                       |
| Dowsey et al. 2010 - The impact of obesity on weight change and outcomes at 12 months in patients undergoing total hip arthroplasty. (22)                                                                    |
| Dowsey et al. 2013 - Predictors of pain and function following total joint replacement. (23)                                                                                                                 |
| Dowsey et al. 2014 - Prospective analysis of rural-urban differences in demographic patterns and outcomes following total joint replacement. (24)                                                            |
| Dowsey et al. 2014 - Outcomes following large joint arthroplasty: does socio-economic status matter? (25)                                                                                                    |
| Dowsey et al. 2015 - Latent class growth analysis predicts long term pain and function trajectories in total knee arthroplasty: a study of 689 patients. (26)                                                |
| Knowles et al. 2016 - Using the common sense model of illness to examine interrelationships between symptom severity and health outcomes in end-stage osteoarthritis patients. (27)                          |

|                                                                                                                                                                                                            |
|------------------------------------------------------------------------------------------------------------------------------------------------------------------------------------------------------------|
| Murphy et al. 2018 - What is the Impact of Advancing Age on the Outcomes of Total Hip Arthroplasty? (28)                                                                                                   |
| Murphy et al. 2018 – The impact of older age on patient outcomes following primary total knee arthroplasty. (29)                                                                                           |
| Ek et al. 2008 - Comparison of functional and radiological outcomes after computer-assisted versus conventional total knee arthroplasty: a matched-control retrospective study. (30)                       |
| Buckland et al. 2010 – Periprosthetic bone remodeling using a triple-taper polished cemented stem in total hip arthroplasty. (31)                                                                          |
| Babazadeh et al. 2013 - The effect of tibio-femoral over-distraction in primary knee arthroplasty. (32)                                                                                                    |
| Balasubramaniam et al. 2016 - Functional and clinical outcomes following anterior hip replacement: a 5-year comparative study versus posterior approach. (33)                                              |
| Wilson et al. 2016 - Impact of surgical experience on outcomes in total joint arthroplasties. (34)                                                                                                         |
| Dowsey et al. 2011 - Economic burden of obesity in primary total knee arthroplasty. (35)                                                                                                                   |
| Peel et al. 2013 - Cost analysis of debridement and retention for management of prosthetic joint infection. (36)                                                                                           |
| Large et al. 2014 - Physiotherapy-led arthroplasty review clinic: a preliminary outcomes analysis. (37)                                                                                                    |
| Peel et al. 2015 - Direct hospital cost determinants following hip and knee arthroplasty. (38)                                                                                                             |
| Schilling et al. 2016 - Using patient-reported outcomes for economic evaluation: getting the timing right. (39)                                                                                            |
| Schilling et al. 2017 - Predicting the long-term gains in health-related quality of life after total knee arthroplasty. (40)                                                                               |
| Dowsey et al. 2017 - Variations in pain and function before and after total knee arthroplasty: a comparison between Swedish and Australian cohorts. (41)                                                   |
| Dowsey et al. 2018 – Body Mass Index Is Associated With All-cause Mortality After THA and TKA. (42)                                                                                                        |
| Tew et al. 2020 - Exploring the Impact of Quality of Life on Survival: A Case Study in Total Knee Replacement Surgery Med Decis Making. (43)                                                               |
| Tew et al. 2020 - Co-morbidities and sex differences in long-term quality-of-life outcomes among patients with and without diabetes after total knee replacement: Five-year data from registry study. (44) |
| Bunzli et al. 2020 - Misconceived expectations. Patient reflections on the total knee replacement journey (45)                                                                                             |
| Klem et al. 2020 - “I’d be satisfied if...” Patient satisfaction after total knee replacement: A qualitative investigation. (46)                                                                           |

1. Choong PF, Dowsey MM, Carr D, Daffy J, Stanley P. Risk factors associated with acute hip prosthetic joint infections and outcome of treatment with a rifampinbased regimen. *Acta Orthop.* 2007;78(6):755-65.
2. Dowsey MM, Choong PF. Obesity is a major risk factor for prosthetic infection after primary hip arthroplasty. *Clin Orthop Relat Res.* 2008;466(1):153-8.
3. Dowsey MM, Choong PF. Obese diabetic patients are at substantial risk for deep infection after primary TKA. *Clin Orthop Relat Res.* 2009;467(6):1577-81.
4. Dowsey MM, Broadhead ML, Stoney JD, Choong PF. Outcomes of total knee arthroplasty in English- versus non-English-speaking patients. *Journal of orthopaedic surgery (Hong Kong).* 2009;17(3):305-9.
5. Swan J, Dowsey M, Babazadeh S, Mandaleson A, Choong PF. Significance of sentinel infective events in haematogenous prosthetic knee infections. *ANZ journal of surgery.* 2011;81(1-2):40-5.
6. Peel TN, Dowsey MM, Daffy JR, Stanley PA, Choong PF, Busing KL. Risk factors for prosthetic hip and knee infections according to arthroplasty site. *The Journal of hospital infection.* 2011;79(2):129-33.
7. Aboltins CA, Dowsey MM, Busing KL, Peel TN, Daffy JR, Choong PF, et al. Gram-negative prosthetic joint infection treated with debridement, prosthesis retention and antibiotic regimens including a fluoroquinolone. *Clinical microbiology and infection : the official publication of the European Society of Clinical Microbiology and Infectious Diseases.* 2011;17(6):862-7.

8. Babazadeh S, Dowsey MM, Stone JD, Choong PF. The accuracy of retrospectively measured range of motion in knee arthroplasty. *Acta orthopaedica Belgica*. 2012;78(6):751-6.
9. Dowsey MM, Nikpour M, Dieppe P, Choong PF. Associations between pre-operative radiographic changes and outcomes after total knee joint replacement for osteoarthritis. *Osteoarthritis Cartilage*. 2012;20(10):1095-102.
10. Peel TN, Buising KL, Dowsey MM, Aboltins CA, Daffy JR, Stanley PA, et al. Outcome of debridement and retention in prosthetic joint infections by methicillin-resistant staphylococci, with special reference to rifampin and fusidic acid combination therapy. *Antimicrobial agents and chemotherapy*. 2013;57(1):350-5.
11. Aboltins C, Dowsey MM, Peel T, Lim WK, Parikh S, Stanley P, et al. Early prosthetic hip joint infection treated with debridement, prosthesis retention and biofilm-active antibiotics: functional outcomes, quality of life and complications. *Intern Med J*. 2013;43(7):810-5.
12. Babazadeh S, Dowsey MM, Bingham RJ, Ek ET, Stoney JD, Choong PFJTK. The long leg radiograph is a reliable method of assessing alignment when compared to computer-assisted navigation and computer tomography. 2013;20(4):242-9.
13. Carroll K, Dowsey M, Choong P, Peel T. Risk factors for superficial wound complications in hip and knee arthroplasty. *Clinical microbiology and infection : the official publication of the European Society of Clinical Microbiology and Infectious Diseases*. 2014;20(2):130-5.
14. Petterwood J, Dowsey MM, Rodda D, Choong PF. The Immediate Post-Operative Radiograph is an Unreliable Measure of Coronal Plane Alignment in Total Knee Replacement. *Frontiers in surgery*. 2014;1:35.
15. Dowsey MM, Spelman T, Choong PF. Development of a Prognostic Nomogram for Predicting the Probability of Nonresponse to Total Knee Arthroplasty 1 Year After Surgery. *J Arthroplasty*. 2016;31(8):1654-60.
16. Anderson NJ, Dowsey MM, Choong PF. Effect of re-transfusion systems on physiotherapy participation and transfusion in total knee joint arthroplasty. *ANZ journal of surgery*. 2016;86(11):916-20.
17. Dowsey MM, Nikpour M, Dieppe P, Choong PF. Associations between pre-operative radiographic osteoarthritis severity and pain and function after total hip replacement : Radiographic OA severity predicts function after THR. *Clin Rheumatol*. 2016;35(1):183-9.
18. Aboltins C, Dowsey M, Peel T, Lim WK, Choong P. Good quality of life outcomes after treatment of prosthetic joint infection with debridement and prosthesis retention. *J Orthop Res*. 2016;34(5):898-902.
19. Singh JA, Dowsey M, Choong PF. Patient Endorsement of the Outcome Measures in Rheumatology (OMERACT) Total Joint Replacement (TJR) clinical trial draft core domain set. *BMC Musculoskelet Disord*. 2017;18(1):111.
20. Scarlato RM, Dowsey MM, Buising KL, Choong PF, Peel TN. What is the role of catheter antibiotic prophylaxis for patients undergoing joint arthroplasty? *ANZ journal of surgery*. 2017;87(3):153-8.
21. Dowsey MM, Liew D, Stoney JD, Choong PF. The impact of pre-operative obesity on weight change and outcome in total knee replacement: a prospective study of 529 consecutive patients. *J Bone Joint Surg Br*. 2010;92(4):513-20.
22. Dowsey MM, Liew D, Stoney JD, Choong PF. The impact of obesity on weight change and outcomes at 12 months in patients undergoing total hip arthroplasty. *Med J Aust*. 2010;193(1):17-21.
23. Dowsey MM, Choong PF. Predictors of pain and function following total joint replacement. *Arthroplasty-Update: IntechOpen*; 2013.
24. Dowsey MM, Petterwood J, Lisik JP, Gunn J, Choong PF. Prospective analysis of rural-urban differences in demographic patterns and outcomes following total joint replacement. *The Australian journal of rural health*. 2014;22(5):241-8.

25. Dowsey MM, Nikpour M, Choong PF. Outcomes following large joint arthroplasty: does socio-economic status matter? *BMC Musculoskelet Disord*. 2014;15:148.
26. Dowsey MM, Smith AJ, Choong PFM. Latent Class Growth Analysis predicts long term pain and function trajectories in total knee arthroplasty: a study of 689 patients. *Osteoarthritis Cartilage*. 2015;23(12):2141-9.
27. Knowles SR, Nelson EA, Castle DJ, Salzberg MR, Choong PF, Dowsey MM. Using the common sense model of illness to examine interrelationships between symptom severity and health outcomes in end-stage osteoarthritis patients. *Rheumatology (Oxford, England)*. 2016.
28. Murphy BPD, Dowsey MM, Spelman T, Choong PFM. What Is the Impact of Advancing Age on the Outcomes of Total Hip Arthroplasty? *J Arthroplasty*. 2018;33(4):1101-7.e1.
29. Murphy BPD, Dowsey MM, Spelman T, Choong PFM. The impact of older age on patient outcomes following primary total knee arthroplasty. *Bone Joint J*. 2018;100-b(11):1463-70.
30. Ek ET, Dowsey MM, Tse LF, Riaz A, Love BR, Stoney JD, et al. Comparison of functional and radiological outcomes after computer-assisted versus conventional total knee arthroplasty: a matched-control retrospective study. *Journal of orthopaedic surgery (Hong Kong)*. 2008;16(2):192-6.
31. Buckland AJ, Dowsey MM, Stoney JD, Hardidge AJ, Ng KW, Choong PF. Periprosthetic bone remodeling using a triple-taper polished cemented stem in total hip arthroplasty. *J Arthroplasty*. 2010;25(7):1083-90.
32. Babazadeh S, Dowsey MM, Stoney JD, Choong PF. The effect of tibio-femoral over-distraction in primary knee arthroplasty. *Knee Surg Sports Traumatol Arthrosc*. 2013;21(12):2810-6.
33. Balasubramaniam U, Dowsey M, Ma F, Dunin A, Choong P. Functional and clinical outcomes following anterior hip replacement: a 5-year comparative study versus posterior approach. *ANZ journal of surgery*. 2016;86(7-8):589-93.
34. Wilson MD, Dowsey MM, Spelman T, Choong PF. Impact of surgical experience on outcomes in total joint arthroplasties. *ANZ journal of surgery*. 2016;86(12):967-72.
35. Dowsey MM, Liew D, Choong PF. Economic burden of obesity in primary total knee arthroplasty. *Arthritis Care Res (Hoboken)*. 2011;63(10):1375-81.
36. Peel TN, Dowsey MM, Buising KL, Liew D, Choong PF. Cost analysis of debridement and retention for management of prosthetic joint infection. *Clinical microbiology and infection : the official publication of the European Society of Clinical Microbiology and Infectious Diseases*. 2013;19(2):181-6.
37. Large KE, Page CJ, Brock K, Dowsey MM, Choong PF. Physiotherapy-led arthroplasty review clinic: a preliminary outcomes analysis. *Australian health review : a publication of the Australian Hospital Association*. 2014;38(5):510-6.
38. Peel TN, Cheng AC, Liew D, Buising KL, Lisik J, Carroll KA, et al. Direct hospital cost determinants following hip and knee arthroplasty. *Arthritis Care Res (Hoboken)*. 2015;67(6):782-90.
39. Schilling C, Dowsey MM, Clarke PM, Choong PF. Using Patient-Reported Outcomes for Economic Evaluation: Getting the Timing Right. *Value in health : the journal of the International Society for Pharmacoeconomics and Outcomes Research*. 2016;19(8):945-50.
40. Schilling CG, Dowsey MM, Petrie DJ, Clarke PM, Choong PF. Predicting the Long-Term Gains in Health-Related Quality of Life After Total Knee Arthroplasty. *J Arthroplasty*. 2017;32(2):395-401.e2.
41. Dowsey MM, Robertsson O, Sundberg M, Lohmander LS, Choong PFM, A WD. Variations in pain and function before and after total knee arthroplasty: a comparison between Swedish and Australian cohorts. *Osteoarthritis Cartilage*. 2017;25(6):885-91.
42. Dowsey MM, Choong PFM, Paxton EW, Spelman T, Namba RS, Inacio MCS. Body Mass Index Is Associated With All-cause Mortality After THA and TKA. *Clin Orthop Relat Res*. 2018;476(6):1139-48.
43. Tew M, Dalziel K, Dowsey M, Choong PF, Clarke P. Exploring the Impact of Quality of Life on Survival: A Case Study in Total Knee Replacement Surgery. *Medical Decision Making*. 2020:0272989X20913266.

44. Tew M, Dowsey MM, Choong A, Choong PF, Clarke P. Co-Morbidities and Sex Differences in Long-Term Quality-of-Life Outcomes among Patients with and without Diabetes after Total Knee Replacement: Five-Year Data from Registry Study. *Journal of Clinical Medicine*. 2020;9(1):19.
45. Bunzli S, O'Brien P, Klem N, Incoll I, Singh J, Davaris M, et al. Misconceived expectations: Patient reflections on the total knee replacement journey. *Musculoskeletal Care*. 2020.
46. Klem NR SA, O'Sullivan P, Dowsey MM, Schutze R, Kent P, Choong PF, Bunzli S. "I'd be satisfied if..." Patient satisfaction after total knee replacement: A qualitative investigation. . *Clin Ortho Rel Res* 2020(In press: Accepted 27/03/2020).
